# Supplementary material for: A Potential Role for CHH DNA Methylation in Cotton Fiber Growth Patterns
Source: PubMed Central journal article supplement (PMC3625195; doi:10.1371/journal.pone.0060547), 2013-04-12

# Figure S2

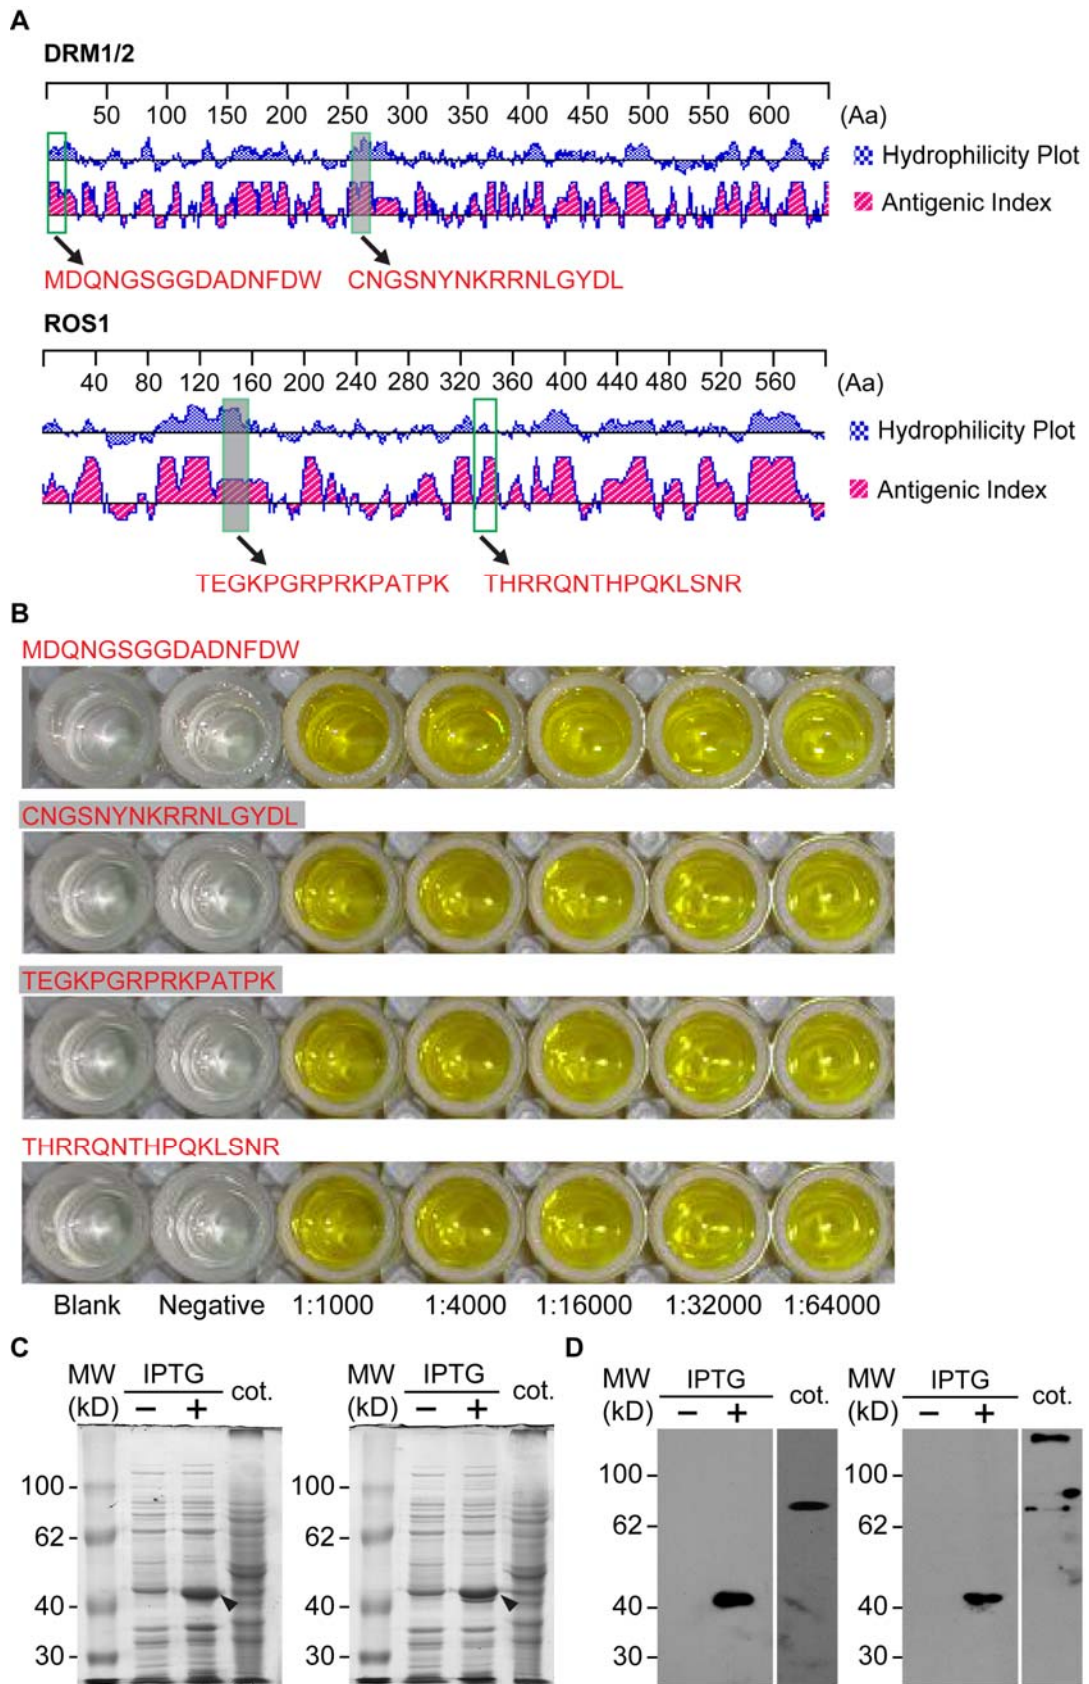

Supplement: pone.0060547.s002.pdf [file pone.0060547.s002.pdf]
