# Supplementary material for: A Potential Role for CHH DNA Methylation in Cotton Fiber Growth Patterns
Source: PubMed Central journal article supplement (PMC3625195; doi:10.1371/journal.pone.0060547), 2013-04-12

Figure S3

A

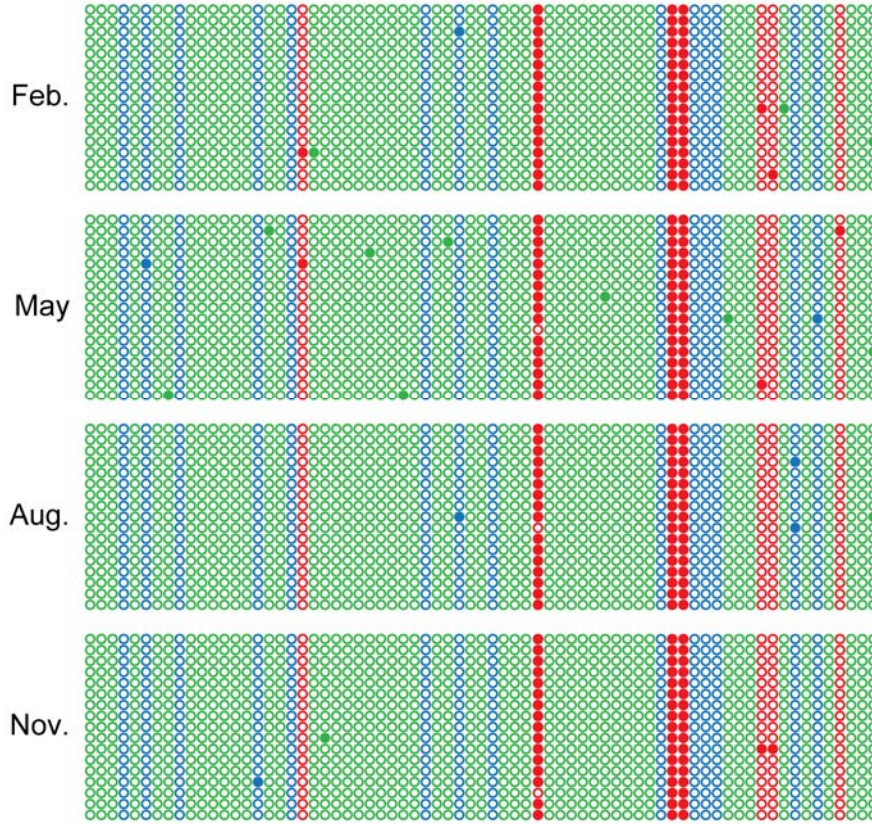

B

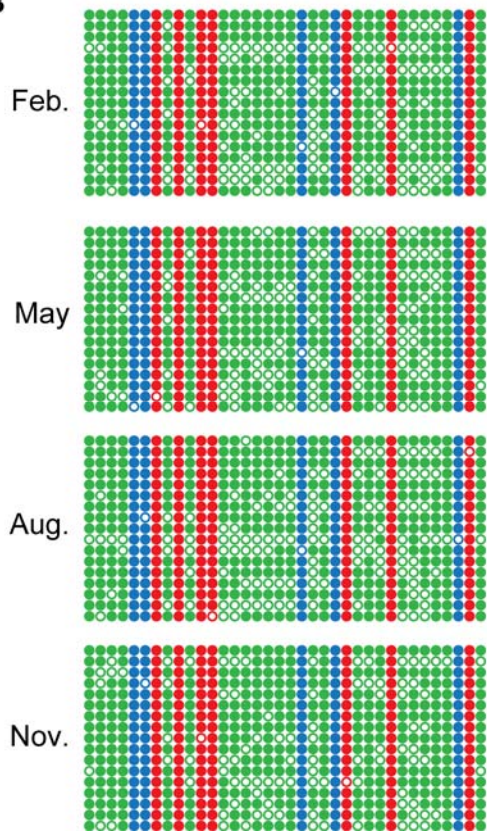

Supplement: pone.0060547.s003.pdf [file pone.0060547.s003.pdf]
