# Supplementary material for: A Potential Role for CHH DNA Methylation in Cotton Fiber Growth Patterns
Source: PubMed Central journal article supplement (PMC3625195; doi:10.1371/journal.pone.0060547), 2013-04-12
Supplement: pone.0060547.s005.pdf [file pone.0060547.s005.pdf]

**Table S1.** Microarray Accession Numbers and Correlation Coefficients for All Hybridizations Performed Using RNA Samples Obtained throughout a One-Year Cycle<sup>a</sup>

| Sample accession number <sup>b</sup> | Title <sup>c</sup>                      | Biological coefficient <sup>d</sup> |        |        | Technical coefficient |
|--------------------------------------|-----------------------------------------|-------------------------------------|--------|--------|-----------------------|
|                                      |                                         | Set 2                               | Set 3  | Set 4  |                       |
| GSM419228                            | cDNA array May / CR set 1               | 0.9677                              | 0.9732 | 0.9699 | 0.9650                |
| GSM419333                            | cDNA array May / CR set 1 (dye swap)    |                                     |        |        |                       |
| GSM419334                            | cDNA array May / CR set 2               |                                     | 0.9709 | 0.9825 | 0.9739                |
| GSM419335                            | cDNA array May / CR set 2 (dye swap)    |                                     |        |        |                       |
| GSM419336                            | cDNA array May / CR set 3               |                                     |        | 0.9669 | 0.9350                |
| GSM419337                            | cDNA array May / CR set 3 (dye swap)    |                                     |        |        |                       |
| GSM419338                            | cDNA array May / CR set 4               |                                     |        |        | 0.9723                |
| GSM419340                            | cDNA array May / CR set 4 (dye swap)    |                                     |        |        |                       |
| GSM419341                            | cDNA array August / CR set 1            | 0.9882                              | 0.9861 | 0.8681 | 0.9570                |
| GSM419343                            | cDNA array August / CR set 1 (dye swap) |                                     |        |        |                       |
| GSM419345                            | cDNA array August / CR set 2            |                                     | 0.9891 | 0.8620 | 0.9815                |
| GSM419346                            | cDNA array August / CR set 2 (dye swap) |                                     |        |        |                       |
| GSM419348                            | cDNA array August / CR set 3            |                                     |        | 0.8772 | 0.9821                |
| GSM419349                            | cDNA array August / CR set 3 (dye swap) |                                     |        |        |                       |
| GSM419351                            | cDNA array August / CR set 4            |                                     |        |        | 0.9776                |
| GSM419352                            | cDNA array August / CR set 4 (dye swap) |                                     |        |        |                       |
| GSM419428                            | cDNA array November / CR set 1          | 0.9798                              | 0.9648 | 0.9593 | 0.9620                |

|           |                                           |        |        |        |        |
|-----------|-------------------------------------------|--------|--------|--------|--------|
| GSM419429 | cDNA array November / CR set 1 (dye swap) |        |        |        |        |
| GSM419430 | cDNA array November / CR set 2            |        | 0.9793 | 0.9770 | 0.9710 |
| GSM419431 | cDNA array November / CR set 2 (dye swap) |        |        |        |        |
| GSM419432 | cDNA array November / CR set 3            |        |        | 0.9772 | 0.9692 |
| GSM419433 | cDNA array November / CR set 3 (dye swap) |        |        |        |        |
| GSM419434 | cDNA array November / CR set 4            |        |        |        | 0.9723 |
| GSM419435 | cDNA array November / CR set 4 (dye swap) |        |        |        |        |
| GSM419436 | cDNA array February / CR set 1            | 0.9385 | 0.9419 | 0.9128 | 0.9529 |
| GSM419437 | cDNA array February / CR set 1 (dye swap) |        |        |        |        |
| GSM419438 | cDNA array February / CR set 2            |        | 0.9557 | 0.9238 | 0.9572 |
| GSM419439 | cDNA array February / CR set 2 (dye swap) |        |        |        |        |
| GSM419440 | cDNA array February / CR set 3            |        |        | 0.8980 | 0.9719 |
| GSM419441 | cDNA array February / CR set 3 (dye swap) |        |        |        |        |
| GSM419442 | cDNA array February / CR set 4            |        |        |        | 0.9773 |
| GSM419443 | cDNA array February / CR set 4 (dye swap) |        |        |        |        |

<sup>a</sup>All microarray data were submitted to the National Center for Biotechnology Information GEO database in MIAME format (platform title “28,178 cotton cDNA array”; accession no. GPL8569).

<sup>b</sup>All 32 samples were deposited to GEO (series title “cDNA expression profiles of 7-dpa wild-type upland cotton (*Gossypium hirsutum* cv. Xuzhou142) ovules over the 1-year cycle”, serial accession no. GSE16802).

<sup>c</sup>May, August, November, and February samples derived from 7-dpa wild-type upland cotton ovules; CR, common reference, an equal mixture of May, August, November, and February RNA samples; sets 1–4, four biological replicates.

<sup>d</sup>We used four independent RNA samples as biological replicates and used swap-dye experiments of each sample as the technical replicates. The coefficients of both biological and technical replications were obtained by applying statistical tools in the R environment, using a Bioconductor package. We performed LOWESS normalization on the technical replicates and only those microarray spots that passed the test were used for subsequent statistical analysis to obtain the biological coefficients.
