# Supplementary material for: A Potential Role for CHH DNA Methylation in Cotton Fiber Growth Patterns
Source: PubMed Central journal article supplement (PMC3625195; doi:10.1371/journal.pone.0060547), 2013-04-12
Supplement: pone.0060547.s006.pdf [file pone.0060547.s006.pdf]

**Table S2.** Genes that Were Preferentially Upregulated<sup>a</sup> from February to August (Class a, 202 Genes) and from August to February (Class b, 33 Genes)

| Class a | Array ID.    | May / CR    | Aug / CR    | Nov / CR    | Feb / CR    | Aug / Feb   | P         | Annotation                                                       |
|---------|--------------|-------------|-------------|-------------|-------------|-------------|-----------|------------------------------------------------------------------|
|         | *28k_244_C06 | 0.90 ± 0.09 | 3.26 ± 0.25 | 1.21 ± 0.09 | 0.67 ± 0.29 | 4.91 ± 1.40 | 6.0E-05   | PR protein class 10                                              |
|         | *28k_222_G10 | 0.92 ± 0.06 | 2.71 ± 0.30 | 1.21 ± 0.17 | 0.64 ± 0.06 | 4.27 ± 0.39 | 1.99E-07  | ethylene-responsive element binding protein 6                    |
|         | *28k_180_F07 | 1.00 ± 0.05 | 2.65 ± 0.16 | 1.10 ± 0.07 | 0.60 ± 0.05 | 4.39 ± 0.29 | 3.42E-08  | ADH1 (ALCOHOL DEHYDROGENASE 1)                                   |
|         | 28k_107_E01  | 0.97 ± 0.05 | 2.53 ± 0.15 | 1.17 ± 0.06 | 0.61 ± 0.07 | 4.18 ± 0.29 | 1.44E-08  | Alcohol dehydrogenase                                            |
|         | *28k_155_B03 | 1.02 ± 0.07 | 2.58 ± 0.23 | 1.17 ± 0.08 | 0.68 ± 0.08 | 3.80 ± 0.38 | 4.61E-06  | alcohol dehydrogenase-like protein                               |
|         | *28k_142_D06 | 1.02 ± 0.07 | 2.46 ± 0.44 | 1.19 ± 0.29 | 0.66 ± 0.14 | 3.73 ± 0.67 | 1.5E-04   | oxidoreductase, zinc-binding dehydrogenase family                |
|         | *28k_214_E09 | 0.92 ± 0.10 | 4.61 ± 0.52 | 1.00 ± 0.06 | 0.61 ± 0.19 | 7.59 ± 1.00 | 3.0E-05   | glycoside hydrolase family 28 protein                            |
|         | *28k_029_B12 | 1.01 ± 0.07 | 2.20 ± 0.20 | 1.00 ± 0.08 | 0.69 ± 0.05 | 3.18 ± 0.30 | 1.0E-05   | plastid-lipid associated protein PAP                             |
|         | *28k_218_A12 | 1.00 ± 0.25 | 1.66 ± 0.13 | 1.00 ± 0.10 | 0.76 ± 0.36 | 2.19 ± 0.54 | 2.9.0E-04 | nucleotidyltransferase family protein                            |
|         | 28k_188_E04  | 1.29 ± 0.24 | 4.12 ± 0.39 | 1.56 ± 0.21 | 0.65 ± 0.18 | 6.30 ± 0.65 | 1.0E-05   | No hits                                                          |
|         | *28k_294_A01 | 1.20 ± 0.04 | 3.64 ± 0.29 | 1.45 ± 0.24 | 0.68 ± 0.14 | 5.38 ± 0.58 | 1.24E-08  | AAP3 ; amino acid transmembrane transporter                      |
|         | *28k_234_C05 | 1.31 ± 0.05 | 3.25 ± 0.13 | 1.32 ± 0.11 | 0.74 ± 0.22 | 4.38 ± 0.68 | 2.6E-04   | ATTPS11 (Arabidopsis thaliana trehalose phosphatase/synthase 11) |
|         | 28k_298_H01  | 1.06 ± 0.05 | 1.74 ± 0.14 | 1.13 ± 0.08 | 0.84 ± 0.18 | 2.07 ± 0.34 | 1.69E-06  | similar to unknown protein (TAIR:AT3G43850.1)                    |
|         | *28k_290_C10 | 1.19 ± 0.08 | 3.27 ± 0.24 | 1.27 ± 0.15 | 0.56 ± 0.22 | 5.79 ± 0.75 | 3.0E-05   | ANAC100/ATNAC5 (Arabidopsis NAC domain containing protein 100)   |
|         | 28k_168_G07  | 1.12 ± 0.06 | 2.30 ± 0.30 | 1.14 ± 0.13 | 0.67 ± 0.14 | 3.43 ± 0.57 | 4.0E-05   | binding/catalytic/transcription repressor                        |
|         | *28k_250_H01 | 1.10 ± 0.10 | 1.76 ± 0.20 | 1.10 ± 0.10 | 0.80 ± 0.09 | 2.20 ± 0.32 | 5.0E-05   | ethylene-responsive family protein                               |
|         | *28k_289_D11 | 1.08 ± 0.04 | 5.01 ± 0.63 | 1.09 ± 0.09 | 0.52 ± 0.14 | 9.56 ± 1.07 | 1.9E-04   | asparagine synthetase                                            |
|         | *28k_187_H04 | 1.09 ± 0.06 | 1.69 ± 0.12 | 1.02 ± 0.09 | 0.81 ± 0.13 | 2.08 ± 0.30 | 1.31E-06  | ALDH6B2 (Aldehyde dehydrogenase 6B2)                             |
|         | *28k_297_F01 | 1.33 ± 0.16 | 2.52 ± 0.29 | 1.09 ± 0.10 | 0.66 ± 0.12 | 3.84 ± 0.65 | 5.0E-05   | HAT22 (homeobox-leucine zipper protein 22)                       |

|              |             |             |             |             |             |          |                                                                              |
|--------------|-------------|-------------|-------------|-------------|-------------|----------|------------------------------------------------------------------------------|
| *28k_222_E11 | 1.25 ± 0.07 | 2.18 ± 0.14 | 1.11 ± 0.09 | 0.69 ± 0.09 | 3.16 ± 0.38 | 2.0E-05  | DME (DEMETER)                                                                |
| *28k_269_C06 | 1.17 ± 0.09 | 1.70 ± 0.19 | 1.09 ± 0.09 | 0.80 ± 0.22 | 2.12 ± 0.39 | 8.0E-05  | GNS1/SUR4 membrane protein family                                            |
| 28k_198_A11  | 0.97 ± 0.13 | 4.07 ± 0.21 | 1.09 ± 0.14 | 0.84 ± 0.20 | 4.85 ± 0.50 | 1.53E-06 | No hits                                                                      |
| *28k_233_D02 | 0.97 ± 0.13 | 2.29 ± 0.25 | 1.09 ± 0.13 | 0.89 ± 0.19 | 2.56 ± 0.42 | 2.1E-04  | short-chain dehydrogenase/reductase (SDR)                                    |
| *28k_084_F03 | 1.03 ± 0.18 | 2.24 ± 0.38 | 1.11 ± 0.09 | 0.86 ± 0.12 | 2.60 ± 0.53 | 4.5E-04  | PIL5 (PHYTOCHROME INTERACTING FACTOR 3-LIKE 5)                               |
| *28k_232_C08 | 1.13 ± 0.09 | 2.84 ± 0.16 | 0.93 ± 0.05 | 0.92 ± 0.16 | 3.10 ± 0.29 | 3.27E-07 | AERO1 (ARABIDOPSIS ENDOPLASMIC RETICULUM OXIDOREDUCTINS 1)                   |
| *28k_273_G02 | 1.08 ± 0.15 | 2.13 ± 0.23 | 1.00 ± 0.09 | 0.93 ± 0.23 | 2.29 ± 0.50 | 5.1E-04  | ACX4 (ACYL-COA OXIDASE 4); oxidoreductase                                    |
| *28k_198_C08 | 0.85 ± 0.11 | 4.54 ± 0.83 | 0.80 ± 0.05 | 0.72 ± 0.10 | 6.29 ± 1.04 | 1.0E-05  | universal stress protein (USP) family protein[ <i>Arabidopsis thaliana</i> ] |
| 28k_203_E04  | 0.88 ± 0.07 | 2.87 ± 0.53 | 0.90 ± 0.09 | 0.86 ± 0.10 | 3.35 ± 0.67 | 5.0E-05  | similar to unknown protein (TAIR:AT5G42690.2)                                |
| *28k_209_F03 | 1.00 ± 0.04 | 2.17 ± 0.27 | 0.91 ± 0.11 | 0.78 ± 0.09 | 2.78 ± 0.37 | 2.76E-06 | CK1 (casein kinase 1-like protein 1)                                         |
| *28k_133_G05 | 1.00 ± 0.10 | 1.88 ± 0.24 | 0.89 ± 0.08 | 0.88 ± 0.12 | 2.15 ± 0.41 | 1.6E-04  | ARABIDOPSIS THALIANA EXPANSIN A1                                             |
| 28k_196_D08  | 1.10 ± 0.06 | 1.78 ± 0.15 | 0.89 ± 0.05 | 0.88 ± 0.10 | 2.01 ± 0.26 | 1.0E-05  | predicted protein                                                            |
| *28k_134_A07 | 1.24 ± 0.07 | 2.05 ± 0.18 | 0.95 ± 0.13 | 0.61 ± 0.38 | 3.35 ± 1.52 | 4.8E-04  | GDSL-motif lipase/hydrolase family protein                                   |
| *28k_233_D07 | 1.26 ± 0.08 | 1.98 ± 0.21 | 0.96 ± 0.17 | 0.71 ± 0.36 | 2.81 ± 1.35 | 4.2E-04  | 3-ketoacyl-CoA synthase                                                      |
| *28k_083_C02 | 1.08 ± 0.11 | 1.61 ± 0.12 | 0.90 ± 0.09 | 0.75 ± 0.13 | 2.15 ± 0.34 | 1.1E-04  | ATPK19; ARABIDOPSIS THALIANA PROTEIN KINASE                                  |
| *28k_135_E06 | 1.13 ± 0.07 | 1.52 ± 0.09 | 0.88 ± 0.08 | 0.76 ± 0.19 | 2.01 ± 0.41 | 2.0E-05  | Serine/threonine-protein kinase AtPK19                                       |
| 28k_224_H07  | 0.99 ± 0.07 | 2.14 ± 0.19 | 0.89 ± 0.08 | 0.62 ± 0.14 | 3.45 ± 0.50 | 1.31E-06 | MEE14 (maternal effect embryo arrest 14)                                     |
| *28k_107_D10 | 0.94 ± 0.13 | 1.83 ± 0.26 | 0.95 ± 0.12 | 0.72 ± 0.13 | 2.56 ± 0.47 | 8.0E-04  | pathogenesis-related protein 10                                              |
| 28k_215_E01  | 0.95 ± 0.11 | 1.54 ± 0.12 | 0.97 ± 0.08 | 0.74 ± 0.13 | 2.08 ± 0.29 | 2.0E-05  | similar to unknown protein (TAIR:AT4G27435.1)                                |

|              |             |             |             |             |              |          |                                                          |
|--------------|-------------|-------------|-------------|-------------|--------------|----------|----------------------------------------------------------|
| *28k_077_B05 | 0.92 ± 0.06 | 1.61 ± 0.13 | 0.90 ± 0.04 | 0.70 ± 0.03 | 2.29 ± 0.18  | 2.91E-07 | ATCTH (Arabidopsis thaliana Cys3His zinc finger protein) |
| 28k_012_A12  | 0.98 ± 0.12 | 1.46 ± 0.14 | 0.94 ± 0.07 | 0.73 ± 0.13 | 2.02 ± 0.39  | 3.0E-05  | MT2A (METALLOTHIONEIN 2A)                                |
| *28k_173_D03 | 0.86 ± 0.03 | 2.36 ± 0.12 | 1.07 ± 0.08 | 0.53 ± 0.13 | 4.44 ± 0.51  | 2.18E-07 | haloacid dehalogenase-like hydrolase family              |
| 28k_220_C08  | 0.86 ± 0.03 | 2.32 ± 0.17 | 1.15 ± 0.10 | 0.53 ± 0.14 | 4.40 ± 0.56  | 4.61E-07 | EFE (ETHYLENE FORMING ENZYME)                            |
| *28k_279_C02 | 0.90 ± 0.04 | 2.97 ± 0.30 | 1.19 ± 0.11 | 0.49 ± 0.21 | 6.08 ± 1.06  | 2.6E-04  | PR protein class 10                                      |
| *28k_287_H11 | 0.91 ± 0.04 | 1.73 ± 0.13 | 1.09 ± 0.06 | 0.72 ± 0.20 | 2.38 ± 0.54  | 2.0 E-05 | phospholipase C                                          |
| 28k_274_D03  | 0.82 ± 0.05 | 2.16 ± 0.20 | 1.08 ± 0.06 | 0.63 ± 0.16 | 3.40 ± 0.50  | 4.42E-07 | transcription factor                                     |
| *28k_283_F05 | 0.92 ± 0.07 | 2.23 ± 0.28 | 1.01 ± 0.12 | 0.61 ± 0.06 | 3.67 ± 0.44  | 4.26E-06 | HGO (Homogentisate 1,2-Dioxygenase)                      |
| *28k_198_C01 | 0.86 ± 0.07 | 5.98 ± 0.27 | 1.12 ± 0.03 | 0.35 ± 0.11 | 16.95 ± 1.10 | 1.67E-09 | GAST1 PROTEIN HOMOLOG 4                                  |
| *28k_167_H09 | 0.92 ± 0.03 | 2.42 ± 0.20 | 1.20 ± 0.06 | 0.50 ± 0.08 | 4.79 ± 0.53  | 1.28E-08 | AMP binding / acetate-CoA ligase                         |
| 28k_054_B07  | 0.84 ± 0.04 | 2.56 ± 0.19 | 1.18 ± 0.10 | 0.43 ± 0.14 | 5.93 ± 0.91  | 2.35E-08 | catalytic/ hydrolase                                     |
| *28k_178_A10 | 0.85 ± 0.08 | 2.51 ± 0.15 | 1.05 ± 0.08 | 0.42 ± 0.13 | 5.92 ± 0.92  | 4.70E-08 | haloacid dehalogenase-like hydrolase family              |
| *28k_152_F03 | 0.80 ± 0.05 | 2.35 ± 0.10 | 1.06 ± 0.07 | 0.45 ± 0.14 | 5.20 ± 0.86  | 3.68E-08 | haloacid dehalogenase-like hydrolase family              |
| *28k_101_A07 | 0.97 ± 0.14 | 1.48 ± 0.14 | 1.02 ± 0.11 | 0.68 ± 0.16 | 2.17 ± 0.47  | 6.1E-04  | 4-hydroxyphenylpyruvate dioxygenase                      |
| 28k_158_G01  | 0.99 ± 0.06 | 2.07 ± 0.30 | 0.98 ± 0.03 | 0.64 ± 0.10 | 3.24 ± 0.49  | 3.0E-05  | MEE14 (maternal effect embryo arrest 14)                 |
| *28k_289_E06 | 1.03 ± 0.05 | 1.99 ± 0.13 | 0.99 ± 0.04 | 0.63 ± 0.16 | 3.13 ± 0.48  | 5.69E-07 | MEE14 (maternal effect embryo arrest 14)                 |
| 28k_214_C07  | 1.07 ± 0.04 | 3.05 ± 0.23 | 1.04 ± 0.08 | 0.49 ± 0.14 | 6.26 ± 1.01  | 3.39E-08 | zinc-binding family                                      |
| *28k_208_B02 | 1.08 ± 0.11 | 2.45 ± 0.29 | 1.08 ± 0.22 | 0.53 ± 0.24 | 4.62 ± 1.12  | 4.0E-05  | haloacid dehalogenase-like hydrolase family protein      |
| *28k_163_D09 | 1.20 ± 0.12 | 4.72 ± 0.86 | 1.54 ± 0.21 | 0.83 ± 0.41 | 5.69 ± 1.65  | 1.2E-04  | SAG21 (Senescence-Associated Gene 21)                    |
| *28k_106_D08 | 1.12 ± 0.06 | 2.71 ± 0.26 | 1.15 ± 0.07 | 0.92 ± 0.25 | 2.93 ± 0.47  | 1.99E-06 | Arabidopsis NAC domain containing protein 83             |
| 28k_297_D02  | 0.98 ± 0.04 | 2.49 ± 0.17 | 1.33 ± 0.08 | 0.96 ± 0.24 | 2.59 ± 0.40  | 2.0E-05  | unnamed protein product                                  |

|              |             |             |             |             |             |          |                                                          |
|--------------|-------------|-------------|-------------|-------------|-------------|----------|----------------------------------------------------------|
| *28k_250_B11 | 1.00 ± 0.06 | 1.67 ± 0.17 | 1.41 ± 0.12 | 0.81 ± 0.09 | 2.05 ± 0.28 | 1.0E-05  | zinc finger (B-box type) family                          |
| *28k_097_E06 | 1.03 ± 0.09 | 1.73 ± 0.19 | 1.39 ± 0.15 | 0.87 ± 0.08 | 2.00 ± 0.29 | 9.0E-05  | ABI2 (ABA INSENSITIVE 2)                                 |
| *28k_303_B02 | 1.57 ± 0.09 | 2.17 ± 0.21 | 1.61 ± 0.11 | 0.64 ± 0.19 | 3.40 ± 1.02 | 2.1E-04  | ROS1 (repressor of silencing 1)                          |
| *28k_169_D11 | 1.39 ± 0.09 | 2.18 ± 0.27 | 1.43 ± 0.30 | 0.73 ± 0.10 | 2.98 ± 0.44 | 6.0E-05  | EBF1 (Ein3-Binding F Box Protein 1)                      |
| *28k_171_A08 | 1.23 ± 0.06 | 1.66 ± 0.06 | 1.19 ± 0.12 | 0.82 ± 0.08 | 2.02 ± 0.17 | 1.63E-07 | EIN3 (ETHYLENE-INSENSITIVE3)                             |
| *28k_225_E02 | 1.60 ± 0.62 | 2.02 ± 0.10 | 1.40 ± 0.06 | 0.83 ± 0.12 | 2.43 ± 0.29 | 7.92E-08 | SKU5; copper ion binding                                 |
| *28k_219_E04 | 1.20 ± 0.34 | 2.42 ± 0.35 | 1.17 ± 0.07 | 0.46 ± 0.12 | 5.25 ± 0.76 | 5.76E-07 | AAE7/ACN1 (Acyl-Activating Enzyme 7)                     |
| *28k_239_A06 | 1.20 ± 0.09 | 2.01 ± 0.50 | 1.09 ± 0.10 | 0.55 ± 0.20 | 3.64 ± 1.00 | 3.5E-04  | asparagine synthetase                                    |
| *28k_293_C12 | 1.20 ± 0.18 | 2.37 ± 0.28 | 1.07 ± 0.13 | 0.40 ± 0.13 | 5.88 ± 1.17 | 5.7E-04  | hypothetical protein                                     |
| *28k_212_G04 | 1.10 ± 0.10 | 1.71 ± 0.21 | 0.98 ± 0.19 | 0.59 ± 0.10 | 2.92 ± 0.49 | 4.0E-05  | LOX1 (Lipoxygenase 2)                                    |
| *28k_263_H06 | 1.31 ± 0.06 | 2.89 ± 0.22 | 1.46 ± 0.20 | 0.48 ± 0.09 | 6.05 ± 0.54 | 5.77E-08 | Putative reticuline oxidase-like protein                 |
| *28k_108_E08 | 1.23 ± 0.11 | 2.83 ± 0.30 | 1.52 ± 0.12 | 0.42 ± 0.07 | 6.68 ± 0.57 | 1.38E-06 | second sucrose synthase                                  |
| 28k_287_C07  | 1.14 ± 0.20 | 2.18 ± 0.18 | 1.32 ± 0.16 | 0.54 ± 0.06 | 4.00 ± 0.51 | 3.0E-05  | ATGDU2 (ARABIDOPSIS THALIANA<br>GLUTAMINE DUMPER 2)      |
| 28k_119_H09  | 1.06 ± 0.05 | 1.78 ± 0.19 | 1.26 ± 0.13 | 0.61 ± 0.18 | 2.91 ± 0.71 | 1.0E-05  | LBD41 (LOB DOMAIN-CONTAINING<br>PROTEIN 41)              |
| 28k_235_C06  | 1.08 ± 0.05 | 3.88 ± 0.38 | 1.31 ± 0.17 | 0.39 ± 0.21 | 9.89 ± 4.09 | 1.0E-05  | No apical meristem (NAM) protein family                  |
| *28k_171_B10 | 1.08 ± 0.06 | 2.33 ± 0.25 | 1.29 ± 0.09 | 0.56 ± 0.12 | 4.19 ± 0.56 | 8.83E-07 | beta-fructosidase (BFRUCT3) /<br>beta-fructofuranosidase |
| *28k_267_B03 | 1.13 ± 0.08 | 1.86 ± 0.20 | 1.12 ± 0.06 | 0.63 ± 0.20 | 2.94 ± 0.78 | 1.0E-05  | ADH1 (ALCOHOL DEHYDROGENASE 1)                           |
| 28k_227_F02  | 1.08 ± 0.06 | 1.53 ± 0.24 | 1.07 ± 0.07 | 0.75 ± 0.13 | 2.06 ± 0.40 | 9.0E-05  | leucine-rich repeat family                               |
| *28k_117_G12 | 1.08 ± 0.08 | 1.60 ± 0.13 | 1.12 ± 0.07 | 0.72 ± 0.11 | 2.23 ± 0.33 | 2.0E-05  | BAS1/CYP734A1 (PHYB ACTIVATION<br>TAGGED SUPPRESSOR 1)   |

|              |             |             |             |             |              |          |                                                                 |
|--------------|-------------|-------------|-------------|-------------|--------------|----------|-----------------------------------------------------------------|
| *28k_246_D05 | 1.40 ± 0.14 | 1.53 ± 0.13 | 1.17 ± 0.06 | 0.63 ± 0.16 | 2.44 ± 0.59  | 5.2E-04  | transformer serine/arginine-rich ribonucleoprotein              |
| *28k_224_D07 | 1.34 ± 0.12 | 1.63 ± 0.12 | 1.41 ± 0.20 | 0.52 ± 0.37 | 3.15 ± 1.93  | 3.0E-05  | putative xyloglucan endotransglycosylase                        |
| *28k_193_A05 | 1.18 ± 0.10 | 1.43 ± 0.09 | 1.18 ± 0.10 | 0.66 ± 0.06 | 2.15 ± 0.24  | 1.79E-06 | EIN3 (ETHYLENE-INSENSITIVE3)                                    |
| *28k_169_C02 | 1.14 ± 0.13 | 1.32 ± 0.15 | 1.15 ± 0.08 | 0.66 ± 0.04 | 2.01 ± 0.23  | 1.0E-05  | prenylated rab acceptor (PRA1)                                  |
| *28k_176_A01 | 1.39 ± 0.10 | 2.48 ± 0.18 | 1.09 ± 0.09 | 0.24 ± 0.13 | 10.47 ± 2.27 | 1.07E-07 | SAG21 (SENESCENCE-ASSOCIATED GENE 21)                           |
| *28k_257_B05 | 1.21 ± 0.11 | 1.42 ± 0.06 | 1.03 ± 0.13 | 0.55 ± 0.09 | 2.56 ± 0.40  | 3.36E-07 | similar to loricrin-related (TAIR:AT5G64550.1)                  |
| 28k_284_E10  | 1.22 ± 0.09 | 1.37 ± 0.09 | 0.98 ± 0.17 | 0.67 ± 0.12 | 2.04 ± 0.27  | 5.2E-04  | senescence-associated family protein                            |
| *28k_222_B03 | 1.10 ± 0.07 | 1.52 ± 0.12 | 0.98 ± 0.10 | 0.54 ± 0.10 | 2.82 ± 0.59  | 1.18E-06 | ACX3 (ACYL-COA OXIDASE 3); acyl-CoA oxidase                     |
| *28k_256_B01 | 1.09 ± 0.05 | 1.54 ± 0.12 | 0.93 ± 0.04 | 0.49 ± 0.07 | 3.18 ± 0.46  | 2.32E-07 | LOX1 (Lipoxygenase 1); lipoxygenase                             |
| *28k_172_B03 | 1.06 ± 0.06 | 1.37 ± 0.06 | 0.97 ± 0.05 | 0.61 ± 0.12 | 2.24 ± 0.41  | 4.26E-07 | LOX1 (Lipoxygenase 3); lipoxygenase                             |
| 28k_279_D06  | 1.09 ± 0.06 | 1.47 ± 0.12 | 0.97 ± 0.07 | 0.62 ± 0.09 | 2.39 ± 0.34  | 1.0E-05  | zinc-binding family                                             |
| 28k_046_H09  | 1.02 ± 0.08 | 1.39 ± 0.09 | 0.99 ± 0.06 | 0.65 ± 0.05 | 2.16 ± 0.21  | 2.21E-06 | similar to CBS domain-containing protein (TAIR:AT2G14520.1)     |
| *28k_072_B11 | 1.08 ± 0.04 | 2.43 ± 0.23 | 1.58 ± 0.13 | 0.47 ± 0.07 | 5.21 ± 0.50  | 2.32E-07 | CIPK6 (CBL-INTERACTING PROTEIN KINASE 6)                        |
| *28k_074_F06 | 1.05 ± 0.07 | 2.10 ± 0.15 | 1.58 ± 0.18 | 0.47 ± 0.17 | 4.47 ± 0.99  | 1.0E-05  | nodulin MtN21 family protein                                    |
| *28k_203_D01 | 1.07 ± 0.11 | 1.68 ± 0.11 | 1.32 ± 0.09 | 0.57 ± 0.05 | 2.94 ± 0.27  | 4.31E-08 | CIPK6 (CBL-INTERACTING PROTEIN KINASE 6)                        |
| *28k_090_A08 | 1.03 ± 0.09 | 1.45 ± 0.15 | 1.14 ± 0.11 | 0.66 ± 0.09 | 2.20 ± 0.35  | 4.0E-05  | leucine-rich repeat family                                      |
| *28k_287_E06 | 1.05 ± 0.07 | 1.36 ± 0.09 | 1.13 ± 0.07 | 0.68 ± 0.28 | 2.00 ± 0.77  | 3.3E-04  | xyloglucan:xyloglucosyl transferase/endo-xyloglucan transferase |

|              |             |             |             |             |             |          |                                                            |
|--------------|-------------|-------------|-------------|-------------|-------------|----------|------------------------------------------------------------|
| *28k_292_C01 | 1.15 ± 0.08 | 1.62 ± 0.15 | 1.44 ± 0.17 | 0.42 ± 0.10 | 3.87 ± 0.86 | 5.5E-04  | ALDH3H1 (Aldehyde Dehydrogenase 4)                         |
| *28k_289_D12 | 1.08 ± 0.09 | 1.53 ± 0.13 | 1.34 ± 0.10 | 0.55 ± 0.09 | 2.76 ± 0.39 | 1.18E-07 | oxysterol-binding family                                   |
| *28k_002_A09 | 1.03 ± 0.09 | 1.42 ± 0.14 | 1.24 ± 0.10 | 0.64 ± 0.12 | 2.22 ± 0.42 | 1.0E-05  | COB (COBRA)                                                |
| 28k_256_G10  | 0.94 ± 0.15 | 1.46 ± 0.07 | 1.25 ± 0.11 | 0.60 ± 0.10 | 2.43 ± 0.45 | 1.0E-05  | similar to unknown protein (TAIR:AT1G21670)                |
| *28k_228_G06 | 1.01 ± 0.09 | 1.38 ± 0.06 | 1.20 ± 0.07 | 0.59 ± 0.06 | 2.33 ± 0.23 | 3.14E-07 | CCR4-NOT transcription complex protein                     |
| 28k_077_E10  | 0.98 ± 0.06 | 1.36 ± 0.08 | 1.31 ± 0.08 | 0.58 ± 0.10 | 2.32 ± 0.32 | 4.24E-06 | auxin/aluminum-responsive protein                          |
| *28k_085_C01 | 0.87 ± 0.06 | 2.12 ± 0.20 | 1.42 ± 0.14 | 0.43 ± 0.15 | 4.93 ± 1.13 | 8.44E-07 | EFE (ETHYLENE FORMING ENZYME)                              |
| *28k_292_F10 | 0.94 ± 0.11 | 1.43 ± 0.12 | 1.16 ± 0.08 | 0.70 ± 0.10 | 2.04 ± 0.40 | 1.7E-04  | DNA binding / zinc ion binding                             |
| 28k_225_H12  | 0.91 ± 0.09 | 1.57 ± 0.19 | 1.25 ± 0.08 | 0.71 ± 0.16 | 2.21 ± 0.49 | 1.5E-04  | AILP1 (aluminium-induced protein with YGL and LRDR motifs) |
| 28k_273_H06  | 0.97 ± 0.14 | 1.48 ± 0.09 | 1.54 ± 0.12 | 0.60 ± 0.21 | 2.45 ± 0.72 | 2.0E-05  | ATSIP2 (ARABIDOPSIS THALIANA SEED IMBIBITION 2)            |
| *28k_131_C10 | 0.91 ± 0.07 | 1.62 ± 0.12 | 1.57 ± 0.09 | 0.53 ± 0.15 | 3.05 ± 1.04 | 4.41E-06 | ATSIP2 (ARABIDOPSIS THALIANA SEED IMBIBITION 2);           |
| 28k_279_E01  | 0.95 ± 0.05 | 1.46 ± 0.06 | 1.39 ± 0.07 | 0.62 ± 0.10 | 2.35 ± 0.32 | 5.24E-07 | auxin/aluminum-responsive protein                          |
| 28k_273_F12  | 0.95 ± 0.03 | 1.39 ± 0.08 | 1.31 ± 0.10 | 0.66 ± 0.08 | 2.12 ± 0.28 | 1.52E-06 | auxin/aluminum-responsive protein                          |
| *28k_151_G03 | 1.00 ± 0.08 | 1.39 ± 0.14 | 1.76 ± 0.23 | 0.58 ± 0.10 | 2.38 ± 0.39 | 1.0E-05  | ATSEH (Arabidopsis thaliana soluble epoxide hydrolase)     |
| *28k_294_A08 | 0.98 ± 0.06 | 1.38 ± 0.15 | 1.59 ± 0.19 | 0.59 ± 0.09 | 2.36 ± 0.76 | 7.3E-04  | serine/threonine protein kinase                            |
| *28k_214_F06 | 0.96 ± 0.05 | 1.89 ± 0.13 | 1.59 ± 0.12 | 0.60 ± 0.15 | 3.16 ± 0.88 | 1.10E-06 | ATSIP2 (ARABIDOPSIS THALIANA SEED IMBIBITION 2)            |
| *28k_242_A09 | 1.09 ± 0.11 | 1.55 ± 0.12 | 1.43 ± 0.11 | 0.70 ± 0.09 | 2.22 ± 0.27 | 3.0E-05  | CIPK6 (CBL-INTERACTING PROTEIN KINASE 6)                   |

|              |             |             |             |             |              |          |                                                                     |
|--------------|-------------|-------------|-------------|-------------|--------------|----------|---------------------------------------------------------------------|
| *28k_251_C02 | 1.18 ± 0.03 | 1.39 ± 0.08 | 1.42 ± 0.12 | 0.68 ± 0.09 | 2.04 ± 0.27  | 1.52E-06 | protein phosphatase 2C/PP2C                                         |
| *28k_072_G05 | 0.75 ± 0.08 | 1.98 ± 0.25 | 0.84 ± 0.06 | 0.50 ± 0.07 | 3.99 ± 0.43  | 4.62E-06 | putative DnaJ protein                                               |
| *28k_162_B04 | 0.89 ± 0.07 | 1.49 ± 0.09 | 0.87 ± 0.06 | 0.59 ± 0.06 | 2.50 ± 0.24  | 1.97E-07 | zinc finger (CCCH-type) family                                      |
| *28k_191_C02 | 0.84 ± 0.03 | 2.41 ± 0.11 | 1.20 ± 0.04 | 0.35 ± 0.19 | 6.86 ± 2.74  | 1.68E-07 | cysteine proteinase, putative                                       |
| 28k_250_A04  | 0.89 ± 0.11 | 1.60 ± 0.09 | 1.06 ± 0.08 | 0.49 ± 0.10 | 3.29 ± 0.50  | 3.67E-10 | dormancy/auxin associated family protein                            |
| *28k_268_E03 | 0.83 ± 0.04 | 1.49 ± 0.16 | 1.01 ± 0.08 | 0.63 ± 0.06 | 2.38 ± 0.30  | 1.0E-05  | heat shock protein binding / unfolded protein binding               |
| *28k_217_E04 | 0.87 ± 0.10 | 1.44 ± 0.19 | 1.10 ± 0.13 | 0.51 ± 0.12 | 2.82 ± 0.87  | 2.0E-05  | protease inhibitor/seed storage/lipid transfer protein (LTP) family |
| 28k_220_B06  | 0.85 ± 0.05 | 1.38 ± 0.09 | 1.14 ± 0.05 | 0.50 ± 0.19 | 2.77 ± 0.62  | 1.0E-05  | dormancy/auxin associated family protein                            |
| *28k_177_A08 | 1.06 ± 0.08 | 1.68 ± 0.12 | 1.30 ± 0.07 | 0.30 ± 0.09 | 5.54 ± 1.40  | 8.29E-08 | PREDICTED: hypothetical protein                                     |
| 28k_143_C04  | 1.16 ± 0.11 | 1.56 ± 0.07 | 1.15 ± 0.08 | 0.43 ± 0.16 | 3.63 ± 0.80  | 9.36E-08 | predicted protein                                                   |
| *28k_191_E10 | 0.95 ± 0.05 | 2.39 ± 0.19 | 1.25 ± 0.10 | 0.30 ± 0.18 | 7.89 ± 2.27  | 4.30E-08 | ACC1 (acetyl-coenzyme a carboxylase 1)                              |
| *28k_191_C03 | 0.99 ± 0.03 | 1.59 ± 0.10 | 1.17 ± 0.05 | 0.44 ± 0.08 | 3.62 ± 0.55  | 1.33E-07 | cysteine proteinase                                                 |
| *28k_186_G01 | 1.00 ± 0.05 | 1.36 ± 0.09 | 1.10 ± 0.09 | 0.62 ± 0.06 | 2.19 ± 0.22  | 5.52E-07 | ABF2 (ABSCISIC ACID RESPONSIVE ELEMENTS-BINDING FACTOR 2)           |
| *28k_196_B05 | 1.01 ± 0.03 | 1.78 ± 0.09 | 0.93 ± 0.05 | 0.29 ± 0.04 | 6.11 ± 0.76  | 5.79E-08 | ATARFA1E (ADP-RIBOSYLATION FACTOR A1E); GTP binding / phospholipase |
| *28k_151_C03 | 1.04 ± 0.05 | 1.39 ± 0.11 | 0.98 ± 0.07 | 0.49 ± 0.14 | 2.82 ± 0.80  | 2.0E-05  | CDA1 (CYTIDINE DEAMINASE 1)                                         |
| *28k_224_E12 | 0.89 ± 0.21 | 2.25 ± 0.14 | 1.17 ± 0.20 | 0.16 ± 0.14 | 13.83 ± 3.38 | 1.55E-06 | peroxidase 30 (PER30) (P30) (PRXR9)                                 |
| *28k_111_C12 | 0.99 ± 0.09 | 1.35 ± 0.21 | 1.10 ± 0.14 | 0.50 ± 0.07 | 2.68 ± 0.44  | 1.0E-04  | chloroplast nucleoid DNA-binding protein                            |
| 28k_181_H07  | 0.97 ± 0.06 | 1.38 ± 0.16 | 1.04 ± 0.08 | 0.56 ± 0.17 | 2.47 ± 0.74  | 1.0E-05  | wound-responsive family protein                                     |
| 28k_142_F11  | 0.96 ± 0.06 | 1.34 ± 0.07 | 1.02 ± 0.08 | 0.56 ± 0.07 | 2.40 ± 0.26  | 1.51E-06 | zinc-binding family                                                 |

|              |             |             |             |             |             |          |                                                                        |
|--------------|-------------|-------------|-------------|-------------|-------------|----------|------------------------------------------------------------------------|
| *28k_187_F02 | 0.86 ± 0.08 | 1.40 ± 0.10 | 1.02 ± 0.13 | 0.38 ± 0.12 | 3.70 ± 1.31 | 3.0E-05  | C/VIF1 (Cell Wall / Vacuolar Inhibitor of Fructosidase 1)              |
| *28k_184_G07 | 0.98 ± 0.21 | 1.41 ± 0.06 | 1.03 ± 0.11 | 0.38 ± 0.07 | 3.70 ± 0.54 | 1.00E-08 | LKR (Saccharopine Dehydrogenase)                                       |
| *28k_195_C06 | 0.98 ± 0.07 | 1.19 ± 0.10 | 0.98 ± 0.08 | 0.59 ± 0.09 | 2.01 ± 0.37 | 1.0E-05  | ATNADP-ME2 (NADP-MALIC ENZYME 2)                                       |
| 28k_085_B04  | 0.97 ± 0.03 | 1.27 ± 0.11 | 0.99 ± 0.08 | 0.55 ± 0.06 | 2.33 ± 0.44 | 8.01E-07 | predicted protein                                                      |
| 28k_132_A05  | 0.96 ± 0.10 | 1.24 ± 0.14 | 0.99 ± 0.08 | 0.59 ± 0.16 | 2.11 ± 0.61 | 3.0E-05  | wound-responsive family                                                |
| *28k_175_B06 | 0.98 ± 0.02 | 1.55 ± 0.09 | 0.91 ± 0.05 | 0.50 ± 0.07 | 3.08 ± 0.37 | 2.58E-07 | AUXIN-REPRESSED 12.5 KD PROTEIN                                        |
| *28k_164_B07 | 0.91 ± 0.07 | 1.35 ± 0.10 | 0.90 ± 0.07 | 0.55 ± 0.07 | 2.45 ± 0.28 | 9.59E-07 | zinc finger (CCCH-type) family                                         |
| *28k_225_G08 | 1.17 ± 0.05 | 1.70 ± 0.29 | 1.35 ± 0.14 | 0.19 ± 0.02 | 8.89 ± 0.80 | 2.0E-05  | ATHB21/HB-2 (homeobox-2); DNA binding / transcription factor           |
| *28k_293_E04 | 1.04 ± 0.11 | 1.32 ± 0.18 | 1.10 ± 0.12 | 0.43 ± 0.17 | 3.08 ± 1.25 | 5.0E-05  | nodulin MtN3 family protein                                            |
| *28k_292_G04 | 1.05 ± 0.08 | 1.24 ± 0.10 | 1.07 ± 0.09 | 0.52 ± 0.07 | 2.39 ± 0.35 | 1.05E-06 | AUX1 (AUXIN RESISTANT 1); amino acid transmembrane transporter         |
| *28k_302_E09 | 1.02 ± 0.08 | 1.15 ± 0.07 | 1.08 ± 0.09 | 0.54 ± 0.12 | 2.15 ± 0.56 | 2.0E-05  | 2-oxoisovalerate dehydrogenase, /3-methyl-2-oxobutanoate dehydrogenase |
| *28k_289_G02 | 1.06 ± 0.04 | 1.67 ± 0.11 | 1.49 ± 0.11 | 0.33 ± 0.10 | 5.14 ± 1.25 | 3.95E-07 | ATNUDT21 (Arabidopsis thaliana Nudix hydrolase homolog 21)             |
| *28k_148_D10 | 1.01 ± 0.03 | 1.27 ± 0.14 | 1.28 ± 0.18 | 0.53 ± 0.08 | 2.37 ± 0.40 | 1.0E-05  | ring finger protein, putative                                          |
| *28k_215_A08 | 1.07 ± 0.08 | 1.30 ± 0.07 | 1.30 ± 0.17 | 0.40 ± 0.04 | 3.25 ± 0.34 | 1.24E-08 | basic helix-loop-helix (bHLH) family protein                           |
| 28k_275_A02  | 1.14 ± 0.13 | 1.19 ± 0.09 | 1.20 ± 0.12 | 0.53 ± 0.08 | 2.25 ± 0.38 | 1.22E-06 | similar to loricrin-related (TAIR:AT5G64550.1)                         |
| *28k_213_B03 | 1.22 ± 0.09 | 1.11 ± 0.09 | 1.00 ± 0.06 | 0.22 ± 0.04 | 4.94 ± 0.91 | 6.33E-08 | CYP71B35 (cytochrome P450, family 71, subfamily B, polypeptide 35)     |
| *28k_235_D07 | 1.26 ± 0.10 | 1.24 ± 0.10 | 1.01 ± 0.14 | 0.18 ± 0.02 | 6.72 ± 0.80 | 1.97E-07 | CYP71B36 (cytochrome P450, family 71,                                  |



|              |             |             |             |             |             |          |                                                                                                                       |
|--------------|-------------|-------------|-------------|-------------|-------------|----------|-----------------------------------------------------------------------------------------------------------------------|
| *28k_227_D09 | 1.16 ± 0.03 | 1.17 ± 0.05 | 1.03 ± 0.07 | 0.38 ± 0.05 | 3.05 ± 0.57 | 1.15E-08 | subfamily B, polypeptide 36); oxygen binding<br>CYP71B26 (cytochrome P450, family 71,<br>subfamily B, polypeptide 26) |
| *28k_114_E06 | 1.13 ± 0.12 | 1.11 ± 0.10 | 1.15 ± 0.15 | 0.38 ± 0.13 | 2.94 ± 1.26 | 2.17E-06 | GATL1/GLZ1/PARVUS<br>(Galacturonosyltransferase-Like 1)                                                               |
| 28k_282_D11  | 1.11 ± 0.05 | 1.38 ± 0.07 | 1.00 ± 0.09 | 0.33 ± 0.04 | 4.11 ± 0.42 | 2.86E-08 | XH/XS domain-containing protein / XS zinc finger<br>domain-containing protein                                         |
| *28k_077_C05 | 1.10 ± 0.12 | 1.26 ± 0.17 | 1.02 ± 0.13 | 0.40 ± 0.07 | 3.15 ± 0.59 | 4.3E-04  | heavy-metal-associated domain-containing protein                                                                      |
| *28k_068_H08 | 1.10 ± 0.05 | 1.19 ± 0.24 | 0.95 ± 0.23 | 0.34 ± 0.12 | 3.56 ± 1.90 | 2.10E-06 | ATK3 (Arabidopsis Thaliana Kinesin 3)                                                                                 |
| 28k_191_A09  | 1.07 ± 0.05 | 1.19 ± 0.07 | 1.02 ± 0.09 | 0.42 ± 0.10 | 2.87 ± 0.71 | 4.0E-05  | similar to unknown protein (TAIR:AT5G18130.1)                                                                         |
| *28k_301_H01 | 1.03 ± 0.04 | 1.19 ± 0.04 | 0.91 ± 0.08 | 0.43 ± 0.08 | 2.76 ± 0.48 | 4.29E-06 | ATUBC2 (UBIQUITIN-CONJUGATING<br>ENZYME 2); ubiquitin-protein ligase                                                  |
| *28k_209_F09 | 1.01 ± 0.10 | 1.17 ± 0.08 | 0.98 ± 0.09 | 0.52 ± 0.09 | 2.24 ± 0.43 | 6.0E-05  | ALDH7B4 (Aldehyde Dehydrogenase 7B4)                                                                                  |
| *28k_242_G08 | 0.98 ± 0.09 | 1.20 ± 0.07 | 1.06 ± 0.23 | 0.36 ± 0.05 | 3.33 ± 0.51 | 7.6E-04  | ALDH2B7 (Aldehyde dehydrogenase 2B7)                                                                                  |
| *28k_302_B01 | 0.94 ± 0.10 | 1.16 ± 0.11 | 1.08 ± 0.09 | 0.38 ± 0.06 | 3.04 ± 0.58 | 4.24E-06 | COL4 (CONSTANS-like 4)                                                                                                |
| *28k_280_A02 | 0.93 ± 0.10 | 1.19 ± 0.09 | 0.97 ± 0.07 | 0.39 ± 0.07 | 3.03 ± 0.67 | 4.0E-05  | heavy-metal-associated domain-containing protein                                                                      |
| *28k_211_B11 | 0.90 ± 0.03 | 1.19 ± 0.08 | 1.05 ± 0.05 | 0.43 ± 0.11 | 2.76 ± 0.74 | 1.3E-04  | SOX (SULFITE OXIDASE)                                                                                                 |
| 28k_169_A02  | 0.97 ± 0.03 | 1.12 ± 0.01 | 0.98 ± 0.09 | 0.27 ± 0.02 | 4.15 ± 0.39 | 4.34E-10 | NAC domain protein                                                                                                    |
| *28k_234_E12 | 0.92 ± 0.07 | 1.18 ± 0.06 | 0.98 ± 0.14 | 0.23 ± 0.06 | 5.09 ± 0.93 | 2.32E-06 | elastin like protein                                                                                                  |
| *28k_189_E06 | 0.95 ± 0.06 | 1.11 ± 0.06 | 1.00 ± 0.04 | 0.43 ± 0.04 | 2.58 ± 0.31 | 5.08E-07 | EIN4 (ETHYLENE INSENSITIVE 4)                                                                                         |
| *28k_222_B12 | 0.95 ± 0.12 | 1.09 ± 0.09 | 1.01 ± 0.10 | 0.39 ± 0.07 | 2.80 ± 0.72 | 1.8E-04  | SOX (SULFITE OXIDASE)                                                                                                 |
| 28k_166_F10  | 0.98 ± 0.04 | 1.12 ± 0.07 | 1.00 ± 0.07 | 0.47 ± 0.05 | 2.39 ± 0.40 | 8.35E-08 | ERD15 (early responsive to dehydration 15)                                                                            |
| *28k_015_E02 | 1.02 ± 0.20 | 1.11 ± 0.07 | 1.02 ± 0.10 | 0.34 ± 0.12 | 3.25 ± 2.11 | 4.3E-04  | ADH1 (ALCOHOL DEHYDROGENASE 1)                                                                                        |

|              |             |             |             |             |             |          |                                                                     |
|--------------|-------------|-------------|-------------|-------------|-------------|----------|---------------------------------------------------------------------|
| *28k_205_A01 | 1.03 ± 0.06 | 1.11 ± 0.04 | 1.04 ± 0.06 | 0.43 ± 0.08 | 2.57 ± 0.69 | 8.39E-07 | CSN6A (COP9 Signalosome Subunit 6A)                                 |
| 28k_209_G05  | 0.89 ± 0.04 | 1.09 ± 0.09 | 1.05 ± 0.07 | 0.40 ± 0.11 | 2.73 ± 1.29 | 4.4E-04  | lateral organ boundaries (LOB) domain family                        |
| *28k_178_G09 | 0.90 ± 0.02 | 1.07 ± 0.13 | 1.07 ± 0.05 | 0.51 ± 0.05 | 2.10 ± 0.29 | 2.44E-06 | metal ion binding                                                   |
| *28k_102_B04 | 0.86 ± 0.05 | 1.10 ± 0.13 | 1.04 ± 0.10 | 0.48 ± 0.09 | 2.28 ± 0.49 | 3.0E-05  | metal ion binding                                                   |
| *28k_229_B03 | 1.01 ± 0.15 | 1.03 ± 0.16 | 1.16 ± 0.28 | 0.40 ± 0.09 | 2.54 ± 0.65 | 1.8E-04  | EDA38 (embryo sac development arrest 38);<br>selenium binding       |
| *28k_157_H04 | 0.98 ± 0.07 | 1.09 ± 0.04 | 1.17 ± 0.12 | 0.45 ± 0.08 | 2.40 ± 0.59 | 6.37E-07 | PDE135 (PIGMENT DEFECTIVE EMBRYO<br>135); transmembrane transporter |
| *28k_260_E01 | 0.93 ± 0.09 | 1.02 ± 0.07 | 1.11 ± 0.12 | 0.43 ± 0.06 | 2.35 ± 0.41 | 2.0E-05  | PDE135 (PIGMENT DEFECTIVE EMBRYO<br>135); transmembrane transporter |
| *28k_235_D02 | 0.79 ± 0.03 | 1.09 ± 0.06 | 0.65 ± 0.04 | 0.26 ± 0.09 | 4.18 ± 1.90 | 2.64E-06 | HSP17.6II (17.6 KDA CLASS II HEAT SHOCK<br>PROTEIN)                 |
| *28k_222_G04 | 0.83 ± 0.07 | 1.06 ± 0.05 | 0.71 ± 0.06 | 0.30 ± 0.05 | 3.48 ± 0.71 | 1.74E-06 | glycosyl hydrolase family 17                                        |
| *28k_036_E03 | 0.74 ± 0.03 | 1.08 ± 0.30 | 0.69 ± 0.05 | 0.30 ± 0.05 | 3.55 ± 1.03 | 1.13E-06 | transferase family                                                  |
| *28k_188_C07 | 0.88 ± 0.10 | 1.11 ± 0.05 | 0.67 ± 0.08 | 0.34 ± 0.10 | 3.21 ± 1.41 | 7.7E-04  | ALDH3I1 (Aldehyde dehydrogenase 3I1) (NAD)                          |
| *28k_180_F06 | 0.84 ± 0.04 | 0.91 ± 0.07 | 0.69 ± 0.04 | 0.39 ± 0.03 | 2.30 ± 0.29 | 1.16E-06 | glucosamine/galactosamine-6-phosphate isomerase<br>family           |
| *28k_212_D08 | 1.03 ± 0.05 | 1.07 ± 0.05 | 0.94 ± 0.08 | 0.34 ± 0.05 | 3.15 ± 0.58 | 4.96E-08 | pfkB-type carbohydrate kinase family protein                        |
| *28k_072_C02 | 0.97 ± 0.07 | 1.01 ± 0.06 | 0.90 ± 0.09 | 0.28 ± 0.08 | 3.66 ± 1.46 | 5.06E-07 | DORMANCY-ASSOCIATED PROTEIN 1                                       |
| *28k_181_C02 | 0.99 ± 0.09 | 1.00 ± 0.05 | 0.85 ± 0.06 | 0.29 ± 0.09 | 3.44 ± 1.45 | 1.31E-06 | dormancy-associated protein -related                                |
| *28k_176_H07 | 1.03 ± 0.05 | 1.02 ± 0.09 | 0.89 ± 0.05 | 0.42 ± 0.08 | 2.42 ± 0.50 | 4.43E-07 | AtGRF8 (Growth-Regulating Factor 8)                                 |
| 28k_175_A04  | 1.15 ± 0.07 | 1.06 ± 0.07 | 0.81 ± 0.04 | 0.31 ± 0.07 | 3.45 ± 0.93 | 1.53E-07 | similar to unknown protein (TAIR:AT3G15450.1)                       |
| 28k_162_E12  | 1.13 ± 0.05 | 1.14 ± 0.07 | 0.79 ± 0.04 | 0.34 ± 0.05 | 3.32 ± 0.53 | 5.46E-08 | similar to unknown protein (TAIR:AT3G15450.1)                       |

|              |             |             |             |             |             |          |                                                                    |
|--------------|-------------|-------------|-------------|-------------|-------------|----------|--------------------------------------------------------------------|
| *28k_208_F01 | 1.02 ± 0.12 | 1.04 ± 0.20 | 0.89 ± 0.10 | 0.51 ± 0.13 | 2.05 ± 0.96 | 3.4E-04  | SUS4; sucrose synthase                                             |
| *28k_282_C04 | 0.78 ± 0.09 | 1.08 ± 0.08 | 0.85 ± 0.19 | 0.22 ± 0.08 | 4.87 ± 2.12 | 3.0E-05  | CYP714A1 (cytochrome P450, family 714, subfamily A, polypeptide 1) |
| *28k_213_G04 | 0.85 ± 0.05 | 1.09 ± 0.06 | 0.91 ± 0.08 | 0.29 ± 0.13 | 3.79 ± 2.27 | 8.34E-07 | trypsin and protease inhibitor family protein                      |
| *28k_050_A12 | 0.88 ± 0.22 | 1.09 ± 0.18 | 0.91 ± 0.09 | 0.40 ± 0.07 | 2.76 ± 0.77 | 4.88E-06 | putative 21 kDa trypsin inhibitor                                  |
| 28k_138_E03  | 0.87 ± 0.06 | 1.14 ± 0.16 | 0.90 ± 0.11 | 0.40 ± 0.14 | 2.88 ± 1.10 | 6.0E-04  | unnamed protein product                                            |
| 28k_168_C02  | 0.87 ± 0.04 | 1.05 ± 0.05 | 0.87 ± 0.02 | 0.24 ± 0.04 | 4.37 ± 0.90 | 5.0E-05  | fiber protein Fb28                                                 |
| *28k_229_E09 | 0.89 ± 0.08 | 1.02 ± 0.04 | 0.93 ± 0.12 | 0.24 ± 0.05 | 4.34 ± 1.55 | 2.57E-08 | nodulin MtN21 family                                               |
| *28k_120_A04 | 0.90 ± 0.09 | 1.05 ± 0.08 | 0.97 ± 0.10 | 0.44 ± 0.16 | 2.38 ± 1.18 | 2.4E-04  | AGP31 (Arabinogalactan-Protein 31)                                 |
| 28k_123_C04  | 0.92 ± 0.08 | 1.02 ± 0.10 | 0.98 ± 0.04 | 0.49 ± 0.05 | 2.09 ± 0.28 | 3.56E-06 | octicosapeptide/Phox/Bem1p (PB1) domain-containing protein         |
| *28k_089_A12 | 0.90 ± 0.08 | 1.09 ± 0.10 | 0.80 ± 0.04 | 0.30 ± 0.08 | 3.57 ± 1.16 | 2.3E-04  | similar to EMB1879 (EMBRYO DEFECTIVE 1879) (TAIR:AT5G49820)        |
| *28k_170_E09 | 0.93 ± 0.05 | 1.09 ± 0.08 | 0.85 ± 0.07 | 0.37 ± 0.07 | 2.96 ± 0.65 | 2.79E-06 | ATNADP-ME2 (NADP-MALIC ENZYME 2)                                   |
| 28k_293_F03  | 0.94 ± 0.06 | 1.07 ± 0.08 | 0.77 ± 0.10 | 0.31 ± 0.07 | 3.43 ± 0.78 | 2.0E-05  | Receptor activity modifying protein 1                              |
| *28k_172_A01 | 0.96 ± 0.18 | 1.04 ± 0.06 | 0.88 ± 0.12 | 0.50 ± 0.12 | 2.06 ± 0.58 | 1.0E-05  | aldo/keto reductase family                                         |
| *28k_245_C09 | 0.86 ± 0.10 | 1.08 ± 0.09 | 0.83 ± 0.08 | 0.38 ± 0.05 | 2.85 ± 0.44 | 2.4E-04  | universal stress protein (USP) family protein                      |
| *28k_115_D08 | 0.88 ± 0.06 | 0.98 ± 0.07 | 0.85 ± 0.08 | 0.32 ± 0.09 | 3.09 ± 1.40 | 3.09E-06 | ATP-binding region, ATPase-like domain-containing protein          |
| *28k_027_F02 | 0.89 ± 0.08 | 0.98 ± 0.09 | 0.82 ± 0.10 | 0.32 ± 0.10 | 3.02 ± 1.68 | 1.8E-04  | auxin-repressed protein                                            |
| *28k_073_G09 | 0.87 ± 0.06 | 0.96 ± 0.11 | 0.88 ± 0.07 | 0.48 ± 0.05 | 2.01 ± 0.35 | 1.0E-05  | BAM1/BMY7/TR-BAMY (beta-amylase 1)                                 |
| *28k_285_A12 | 0.81 ± 0.09 | 1.21 ± 0.17 | 0.92 ± 0.18 | 0.47 ± 0.09 | 2.59 ± 0.78 | 6.2E-04  | GCL1 (GCR2-LIKE 1); catalytic                                      |

| <b>Class b</b> | <b>Array ID.</b> | <b>May / CR</b> | <b>Aug / CR</b> | <b>Nov / CR</b> | <b>Feb / CR</b> | <b>Feb / Aug</b> | <b>P</b> | <b>Annotation</b> |
|----------------|------------------|-----------------|-----------------|-----------------|-----------------|------------------|----------|-------------------|
|----------------|------------------|-----------------|-----------------|-----------------|-----------------|------------------|----------|-------------------|

|              |             |             |             |             |             |            |                                                  |
|--------------|-------------|-------------|-------------|-------------|-------------|------------|--------------------------------------------------|
| *28k_094_G01 | 0.82 ± 0.46 | 0.83 ± 0.22 | 0.82 ± 0.63 | 2.44 ± 1.69 | 2.94 ± 1.74 | 1.1E-04    | terpene synthase/cyclase family protein          |
| *28k_063_A12 | 0.94 ± 0.28 | 0.86 ± 0.20 | 0.89 ± 0.29 | 1.99 ± 0.89 | 2.31 ± 0.93 | 7.0E-04    | (+)-delta-cadinene synthase                      |
| *28k_231_E03 | 1.15 ± 0.08 | 0.91 ± 0.21 | 0.96 ± 0.11 | 2.69 ± 0.76 | 2.96 ± 0.83 | 2.3E-04    | CYCP4; cyclin-dependent protein kinase           |
| *28k_006_F11 | 1.05 ± 0.10 | 0.87 ± 0.14 | 0.93 ± 0.12 | 1.94 ± 0.43 | 2.23 ± 0.48 | 6.09E-06   | Catalase                                         |
| 28k_203_C07  | 0.97 ± 0.10 | 0.96 ± 0.32 | 0.98 ± 0.15 | 2.53 ± 0.53 | 2.64 ± 0.59 | 2.0E-05    | hypothetical protein                             |
| 28k_223_E06  | 1.01 ± 0.10 | 0.96 ± 0.22 | 1.01 ± 0.14 | 2.25 ± 0.39 | 2.34 ± 0.51 | 6.61E-06   | hypothetical protein                             |
| *28k_116_D07 | 0.96 ± 0.14 | 0.98 ± 0.09 | 1.08 ± 0.28 | 2.06 ± 0.33 | 2.10 ± 0.55 | 1.0E-04    | RDR6 (RNA-dependent RNA polymerase 6)            |
| *28k_163_D04 | 0.94 ± 0.16 | 0.96 ± 0.25 | 1.03 ± 0.15 | 2.15 ± 0.47 | 2.24 ± 0.53 | 6.20E-06   | predicted protein                                |
| *28k_300_H11 | 0.96 ± 0.17 | 0.96 ± 0.31 | 1.05 ± 0.13 | 1.94 ± 0.19 | 2.02 ± 0.29 | 9.0E-05    | Protein-tyrosine phosphatase-like member B       |
| 28k_200_D03  | 1.02 ± 0.09 | 0.92 ± 0.14 | 1.03 ± 0.07 | 2.21 ± 0.47 | 2.40 ± 0.50 | 2.0E-05    | mitotic checkpoint family protein                |
| *28k_201_A09 | 0.98 ± 0.08 | 0.92 ± 0.18 | 1.06 ± 0.05 | 2.13 ± 0.60 | 2.32 ± 0.68 | 5.0E-05    | AGD8 (ARF-GAP DOMAIN 8); DNA binding             |
| *28k_201_F03 | 1.04 ± 0.09 | 0.96 ± 0.19 | 1.07 ± 0.12 | 2.06 ± 0.53 | 2.15 ± 0.57 | 3.47E-06   | Serine/Threonine Protein Kinase 1                |
| *28k_100_H07 | 0.97 ± 0.18 | 0.76 ± 0.10 | 1.05 ± 0.13 | 1.94 ± 0.28 | 2.55 ± 0.34 | 4.29E-06   | DCL3 (DICER-LIKE 3)                              |
| *28k_047_E10 | 0.93 ± 0.11 | 0.86 ± 0.19 | 1.00 ± 0.18 | 1.83 ± 0.19 | 2.13 ± 0.35 | 4.21.0E-04 | CMT3 (chromomethylase 3)                         |
| *28k_125_H05 | 1.05 ± 0.13 | 0.93 ± 0.16 | 1.19 ± 0.16 | 2.30 ± 0.37 | 2.47 ± 0.43 | 9.63E-06   | leucine-rich repeat transmembrane protein kinase |
| *28k_302_C07 | 1.16 ± 0.14 | 0.91 ± 0.16 | 1.16 ± 0.08 | 2.10 ± 0.42 | 2.31 ± 0.47 | 4.01E-06   | leucine-rich repeat transmembrane protein kinase |
| 28k_256_E07  | 1.19 ± 0.19 | 0.98 ± 0.21 | 1.39 ± 0.35 | 2.26 ± 1.09 | 2.31 ± 1.11 | 7.0E-05    | dehydration-responsive family protein            |
| 28k_258_A02  | 1.24 ± 0.17 | 0.91 ± 0.25 | 1.36 ± 0.31 | 2.06 ± 1.18 | 2.26 ± 1.24 | 1.0E-04    | dehydration-responsive family protein            |
| *28k_041_D07 | 1.01 ± 0.12 | 0.83 ± 0.20 | 1.33 ± 0.19 | 2.19 ± 0.77 | 2.64 ± 0.82 | 4.5E-04    | chloroplast-encoded ribosomal protein S18        |
| *28k_284_F07 | 1.05 ± 0.06 | 0.86 ± 0.15 | 1.22 ± 0.09 | 1.84 ± 0.45 | 2.14 ± 0.49 | 9.97E-06   | gibberellin-responsive protein                   |
| *28k_202_G02 | 1.04 ± 0.16 | 0.73 ± 0.19 | 1.29 ± 0.22 | 1.81 ± 0.56 | 2.48 ± 0.70 | 5.5E-04    | 30S chloroplast ribosomal protein S14            |
| *28k_248_D02 | 0.87 ± 0.08 | 0.74 ± 0.06 | 1.23 ± 0.09 | 1.86 ± 0.58 | 2.51 ± 0.59 | 5.9E-04    | ATLP-1 (Arabidopsis thaumatin-like protein 1)    |
| *28k_297_C12 | 0.93 ± 0.12 | 0.76 ± 0.10 | 1.11 ± 0.26 | 1.61 ± 0.43 | 2.12 ± 0.46 | 4.0E-04    | nucleic acid binding protein, putative           |

|              |             |             |             |             |             |          |                                                  |
|--------------|-------------|-------------|-------------|-------------|-------------|----------|--------------------------------------------------|
| *28k_163_G11 | 1.08 ± 0.11 | 0.67 ± 0.08 | 1.55 ± 0.12 | 1.51 ± 0.43 | 2.25 ± 0.48 | 9.1E-04  | SGS3 (Suppressor Of Gene Silencing 3)            |
| 28k_119_A01  | 1.05 ± 0.13 | 0.56 ± 0.06 | 1.50 ± 0.40 | 1.28 ± 0.29 | 2.29 ± 0.35 | 1.5E-04  | hypothetical protein                             |
| 28k_159_B07  | 0.87 ± 0.19 | 0.58 ± 0.10 | 0.95 ± 0.13 | 1.69 ± 0.58 | 2.91 ± 0.64 | 8.9E-04  | No hits                                          |
| *28k_250_E10 | 0.87 ± 0.10 | 0.53 ± 0.05 | 0.91 ± 0.12 | 1.37 ± 0.22 | 2.58 ± 0.27 | 3.2E-04  | DRM2 (Domains Rearranged Methyltransferase 2)    |
| *28k_191_A06 | 0.90 ± 0.08 | 0.64 ± 0.15 | 0.87 ± 0.12 | 1.32 ± 0.26 | 2.06 ± 0.41 | 7.10E-06 | RDR1 (RNA-Dependent RNA Polymerase 1)            |
| *28k_101_G08 | 1.00 ± 0.11 | 0.66 ± 0.14 | 1.11 ± 0.30 | 1.47 ± 0.46 | 2.23 ± 0.59 | 6.3E-04  | unnamed protein product                          |
| 28k_259_D05  | 0.81 ± 0.14 | 0.54 ± 0.17 | 1.21 ± 0.07 | 1.31 ± 0.30 | 2.43 ± 0.64 | 1.0E-04  | No hits                                          |
| *28k_251_F10 | 1.00 ± 0.08 | 0.45 ± 0.04 | 1.04 ± 0.16 | 1.19 ± 0.23 | 2.64 ± 0.29 | 1.8E-04  | Ocs element-binding factor, putative             |
| *28k_060_H07 | 0.91 ± 0.13 | 0.47 ± 0.08 | 0.97 ± 0.12 | 1.10 ± 0.20 | 2.34 ± 0.43 | 1.1E-04  | heavy-metal-associated domain-containing protein |
| 28k_136_F03  | 1.06 ± 0.12 | 0.43 ± 0.08 | 0.87 ± 0.12 | 1.07 ± 0.11 | 2.49 ± 0.44 | 5.5E-04  | putative uncharacterized protein At1g72240       |

<sup>a</sup>Upregulation scored by >2.0-fold increase with false discovery rate-corrected P values < 0.001.

\* Indicates 176 genes with GO annotations.
