# Supplementary material for: A Potential Role for CHH DNA Methylation in Cotton Fiber Growth Patterns
Source: PubMed Central journal article supplement (PMC3625195; doi:10.1371/journal.pone.0060547), 2013-04-12
Supplement: pone.0060547.s007.pdf [file pone.0060547.s007.pdf]

**Table S3.** Gene Ontology (GO) End-Terms of Significantly Upregulated Genes<sup>a</sup>

| <b>Serial no.</b> | <b>GO ID</b> | <b>GO term</b>                                            | <b>No. upregulated genes<sup>b</sup></b> | <b>No. genes in each GO ID</b> | <b>Q value<sup>c</sup></b> |
|-------------------|--------------|-----------------------------------------------------------|------------------------------------------|--------------------------------|----------------------------|
| 1                 | GO:0006306   | DNA methylation                                           | 5                                        | 17                             | 2.49E-06                   |
| 2                 | GO:0043617   | cellular response to sucrose starvation                   | 2                                        | 5                              | 0.0008                     |
| 3                 | GO:0030702   | chromatin silencing at centromere                         | 2                                        | 5                              | 0.0008                     |
| 4                 | GO:0031060   | regulation of histone methylation                         | 2                                        | 5                              | 0.0008                     |
| 5                 | GO:0009755   | hormone-mediated signaling                                | 15                                       | 521                            | 0.0011                     |
| 6                 | GO:0009693   | ethylene biosynthesis                                     | 3                                        | 18                             | 0.0015                     |
| 7                 | GO:0006529   | asparagine biosynthesis                                   | 2                                        | 8                              | 0.0029                     |
| 8                 | GO:0006572   | tyrosine catabolic process                                | 2                                        | 8                              | 0.0029                     |
| 9                 | GO:0009646   | response to absence of light                              | 2                                        | 9                              | 0.0041                     |
| 10                | GO:0009269   | response to desiccation                                   | 2                                        | 10                             | 0.0050                     |
| 11                | GO:0032270   | positive regulation of cellular protein metabolic process | 2                                        | 10                             | 0.0050                     |
| 12                | GO:0009739   | response to gibberellin                                   | 4                                        | 52                             | 0.0053                     |
| 13                | GO:0009835   | ripening                                                  | 3                                        | 29                             | 0.0065                     |
| 14                | GO:0016246   | RNA interference                                          | 3                                        | 29                             | 0.0065                     |

<sup>a</sup>Of 28,178 cotton UniESTs printed on the microarray, 17,430 were annotated in GO (cut-off E-value =  $1e^{-5}$ ) and used for GOEAST analysis.

<sup>b</sup> Number of genes preferentially upregulated in either summer or winter samples.

<sup>c</sup> False discovery rate–corrected P value.
