# Supplementary material for: A Potential Role for CHH DNA Methylation in Cotton Fiber Growth Patterns
Source: PubMed Central journal article supplement (PMC3625195; doi:10.1371/journal.pone.0060547), 2013-04-12
Supplement: pone.0060547.s008.pdf [file pone.0060547.s008.pdf]

**Table S4.** Detailed Sequence Information for Genes Represented in GO ID: 0006306

| <b>Array ID</b> | <b>Enzyme</b> | <b>Best hit in NCBI<sup>a</sup></b> | <b>cDNA length<br/>(bp)<sup>b</sup></b> | <b>ORF length<br/>(bp)</b> | <b>Predicted protein<br/>MW (kDa)</b> | <b>Amino acid<br/>identity</b> | <b>Conserved<br/>domain<sup>c</sup></b> | <b>E value</b> |
|-----------------|---------------|-------------------------------------|-----------------------------------------|----------------------------|---------------------------------------|--------------------------------|-----------------------------------------|----------------|
| 28k_250_E10     | DRM1/2        | NP_196966                           | 2261 / 2183                             | 1911                       | 70.85                                 | 55%                            | cd00315                                 | 0              |
| 28k_047_E10     | CMT3          | NP_177315                           | 3151 / 2764                             | 2706                       | 101.47                                | 58%                            | COG0270                                 | 0              |
| 28k_279_B03     | DCL3          | NP_189978                           | 5634 / 4744                             | 4968                       | 185.02                                | 51%                            | cd00593                                 | 0              |
| 28k_303_B02     | ROS1          | NP_181190                           | 5492 / 4420                             | 5277                       | 196.80                                | 69%                            | cd00056                                 | 0              |
| 28k_222_E11     | DME           | NP_001078527                        | 6779 / 6475                             | 6189                       | 230.78                                | 64%                            | cd00056                                 | 0              |

<sup>a</sup>Closest *Arabidopsis thaliana* homolog exhibiting the lowest BLASTX E value compared to the cotton enzyme.

<sup>b</sup>cDNA length of putative cotton gene/cDNA length of best matched *A. thaliana* gene.

<sup>c</sup>The putative open reading frame of each cDNA was translated into amino acid sequence, and conserved domains were searched using BLASTP. cd00315, cytosine-C5-specific DNA methylases; COG0270, site-specific DNA methylase; cd00593, RIBOc, ribonuclease III C terminal domain; cd00056, endonuclease III.
