# Supplementary material for: A Potential Role for CHH DNA Methylation in Cotton Fiber Growth Patterns
Source: PubMed Central journal article supplement (PMC3625195; doi:10.1371/journal.pone.0060547), 2013-04-12
Supplement: pone.0060547.s009.pdf [file pone.0060547.s009.pdf]

**Table S5.** Relative Expression of 20 *Gossypium hirsutum* Housekeeping Genes Based on Microarray and QRT-PCR Analysis

| Array ID    | Relative expression ratios <sup>a</sup> |             |             |             | Annotation <sup>b</sup> |
|-------------|-----------------------------------------|-------------|-------------|-------------|-------------------------|
|             | May                                     | Aug.        | Nov.        | Feb.        |                         |
| 28k_212_F04 | 0.94 ± 0.10                             | 0.93 ± 0.11 | 0.91 ± 0.05 | 0.90 ± 0.14 | <i>UBQ7</i>             |
|             | 0.96 ± 0.05                             | 0.99 ± 0.02 | 1.00 ± 0.12 | 1.05 ± 0.05 |                         |
| 28k_172_C11 | 1.02 ± 0.12                             | 1.10 ± 0.06 | 1.10 ± 0.10 | 0.99 ± 0.17 | <i>UBQF</i>             |
|             | 1.14 ± 0.09                             | 0.97 ± 0.08 | 0.93 ± 0.05 | 0.96 ± 0.03 |                         |
| 28k_070_H12 | 0.96 ± 0.11                             | 0.99 ± 0.09 | 0.90 ± 0.07 | 1.02 ± 0.17 | <i>TUA3</i>             |
|             | 1.04 ± 0.03                             | 0.95 ± 0.04 | 0.92 ± 0.04 | 1.10 ± 0.09 |                         |
| 28k_211_H07 | 1.08 ± 0.07                             | 1.07 ± 0.07 | 1.06 ± 0.09 | 1.13 ± 0.14 | <i>TUA8</i>             |
|             | 1.02 ± 0.07                             | 0.98 ± 0.07 | 0.97 ± 0.08 | 1.03 ± 0.08 |                         |
| 28k_284_E12 | 1.00 ± 0.05                             | 0.97 ± 0.08 | 0.95 ± 0.07 | 0.93 ± 0.09 | <i>TUB2</i>             |
|             | 1.05 ± 0.13                             | 0.99 ± 0.02 | 0.96 ± 0.05 | 1.00 ± 0.05 |                         |
| 28k_285_C10 | 1.01 ± 0.02                             | 1.01 ± 0.05 | 0.99 ± 0.04 | 1.12 ± 0.24 | <i>TUB10</i>            |
|             | 1.00 ± 0.03                             | 1.02 ± 0.12 | 0.99 ± 0.11 | 0.99 ± 0.11 |                         |
| 28k_242_B06 | 1.01 ± 0.10                             | 0.93 ± 0.13 | 0.96 ± 0.09 | 1.03 ± 0.14 | <i>TUB18</i>            |
|             | 1.07 ± 0.08                             | 0.97 ± 0.06 | 1.02 ± 0.04 | 0.94 ± 0.02 |                         |
| 28k_099_G03 | 0.95 ± 0.02                             | 0.94 ± 0.06 | 0.95 ± 0.07 | 1.03 ± 0.14 | <i>RPL8C</i>            |
|             | 1.04 ± 0.14                             | 0.94 ± 0.07 | 1.04 ± 0.12 | 0.98 ± 0.09 |                         |
| 28k_170_E03 | 0.92 ± 0.05                             | 0.93 ± 0.03 | 0.97 ± 0.07 | 0.98 ± 0.14 | <i>RPL19B</i>           |
|             | 1.12 ± 0.05                             | 0.91 ± 0.04 | 0.94 ± 0.02 | 1.04 ± 0.06 |                         |
| 28k_220_B09 | 0.99 ± 0.06                             | 0.92 ± 0.09 | 1.02 ± 0.07 | 1.02 ± 0.10 | <i>RPS4A</i>            |
|             | 0.97 ± 0.05                             | 0.93 ± 0.06 | 1.05 ± 0.04 | 1.05 ± 0.03 |                         |
| 28k_211_B03 | 0.95 ± 0.11                             | 1.04 ± 0.10 | 1.02 ± 0.08 | 1.00 ± 0.06 | <i>RPSA</i>             |
|             | 0.95 ± 0.04                             | 1.01 ± 0.03 | 1.11 ± 0.08 | 0.94 ± 0.02 |                         |
| 28k_170_A12 | 0.91 ± 0.06                             | 0.91 ± 0.08 | 1.06 ± 0.09 | 1.01 ± 0.08 | <i>RPS9C</i>            |
|             | 0.93 ± 0.10                             | 1.06 ± 0.04 | 1.02 ± 0.06 | 0.98 ± 0.02 |                         |
| 28k_121_D07 | 1.07 ± 0.16                             | 0.94 ± 0.10 | 1.04 ± 0.12 | 0.93 ± 0.15 | <i>eIF2A</i>            |
|             | 1.05 ± 0.12                             | 0.95 ± 0.16 | 1.02 ± 0.09 | 0.98 ± 0.10 |                         |
| 28k_284_D01 | 1.08 ± 0.11                             | 1.07 ± 0.11 | 1.05 ± 0.11 | 0.99 ± 0.17 | <i>eIF2B</i>            |
|             | 1.05 ± 0.10                             | 1.00 ± 0.09 | 1.01 ± 0.09 | 0.95 ± 0.09 |                         |
| 28k_273_D08 | 1.12 ± 0.04                             | 1.15 ± 0.12 | 1.12 ± 0.05 | 1.07 ± 0.19 | <i>eIF3B</i>            |
|             | 1.07 ± 0.16                             | 1.03 ± 0.15 | 0.94 ± 0.02 | 0.96 ± 0.13 |                         |
| 28k_088_G09 | 1.07 ± 0.16                             | 0.95 ± 0.06 | 1.05 ± 0.10 | 1.01 ± 0.07 | <i>eIF4A</i>            |
|             | 0.95 ± 0.06                             | 1.04 ± 0.04 | 0.95 ± 0.08 | 1.06 ± 0.02 |                         |
| 28k_184_A01 | 0.92 ± 0.07                             | 1.10 ± 0.18 | 0.92 ± 0.08 | 0.95 ± 0.10 | <i>GAPDH</i>            |
|             | 0.97 ± 0.10                             | 1.00 ± 0.05 | 0.94 ± 0.08 | 1.08 ± 0.03 |                         |

|             |             |             |             |             |             |
|-------------|-------------|-------------|-------------|-------------|-------------|
| 28k_207_F09 | 0.92 ± 0.07 | 0.95 ± 0.05 | 0.93 ± 0.08 | 1.02 ± 0.16 | <i>COX</i>  |
|             | 0.96 ± 0.12 | 1.05 ± 0.08 | 1.04 ± 0.04 | 0.94 ± 0.04 |             |
| 28k_121_A02 | 1.02 ± 0.10 | 0.96 ± 0.06 | 1.08 ± 0.06 | 0.95 ± 0.12 | <i>ACT7</i> |
|             | 0.95 ± 0.05 | 1.01 ± 0.10 | 0.92 ± 0.01 | 1.12 ± 0.09 |             |
| 28k_282_A09 | 0.96 ± 0.07 | 1.00 ± 0.05 | 1.02 ± 0.07 | 1.04 ± 0.11 | <i>FBA</i>  |
|             | 1.04 ± 0.11 | 0.97 ± 0.08 | 1.01 ± 0.04 | 0.99 ± 0.02 |             |

---

<sup>a</sup>Relative expression ratios of May, August, November, and February compared to CR based on microarray (top) and QRT-PCR (bottom) analysis.

<sup>b</sup>*UBQF*, ubiquitin family; *TUA*, tubulin alpha; *TUB*, tubulin beta; *RPL*, 60S ribosomal protein; *RPS*, 40S ribosomal protein; *eIF*, eukaryotic translation initiation factor; *GAPDH*, glyceraldehyde-3-phosphate dehydrogenase; *COX*, cytochrome c oxidase subunit; *ACT*, actin; *FBA*, fructose-bisphosphate aldolase.
