# Supplementary material for: A Potential Role for CHH DNA Methylation in Cotton Fiber Growth Patterns
Source: PubMed Central journal article supplement (PMC3625195; doi:10.1371/journal.pone.0060547), 2013-04-12
Supplement: pone.0060547.s010.pdf [file pone.0060547.s010.pdf]

**Table S6.** Primers Used in the Current Work

| <b>Gene</b>             | <b>Sequence</b>                                                 | <b>Amplified fragment length (bp)</b> |
|-------------------------|-----------------------------------------------------------------|---------------------------------------|
| <b>QRT-PCR analysis</b> |                                                                 |                                       |
| <i>CMT3</i>             | 5' - TTACCAAGTCCGAATGGGAATGAT<br>5' - TCATCCGTGTTGAGTTGAAGTGG   | 421                                   |
| <i>DRM1/2</i>           | 5' - CATCCCTCTTATCGCTGCCTTCC<br>5' - AAGCAGACCTTACTTCTCGTGGG    | 352                                   |
| <i>DCL3</i>             | 5' - TTGGTAGGAGAGGGGTTTGATAG<br>5' - ACTGGGGTGGCAGGCGTAG        | 245                                   |
| <i>ROS1</i>             | 5' - CAACAGTTACAAGCCGCATCCAC<br>5' - AAGGTACTIONTGCACGGGTCGTCAG | 334                                   |
| <i>DME</i>              | 5' - ATGCTGCTTCTATCCCTACTCCA<br>5' - GATCATCAGGTTCCCGCTTTT      | 126                                   |
| <i>UBQ7</i>             | 5' - GAAGGCATTCCACCTGACCAAC<br>5' - CTTGACCTTCTTCTTCTTGTGCTTG   | 198                                   |
| <i>UBQF</i>             | 5' - GCCAGATGCTTCTCAGTTGACTC<br>5' - GCTGGGATAGAAGTGATTGCTGT    | 246                                   |
| <i>TUA3</i>             | 5' - GAGGTTTTCTCCCGAATCGAC<br>5' - CATTGACTGCGACTGCTGATTT       | 231                                   |
| <i>TUA8</i>             | 5' - AGGTGCAGCGAGCTGTTTGT<br>5' - CCTCACAGGGTGAACCCATC          | 295                                   |
| <i>TUB2</i>             | 5' - CTGGTGAGGGAATGGATGAGAT<br>5' - ACAAAGGAACGAACAGAGCAGAA     | 282                                   |
| <i>TUB10</i>            | 5' - ACTGGTGAAGGGATGGATGAAA<br>5' - CAAGGCTGGAATGCAAACATAA      | 296                                   |
| <i>TUB18</i>            | 5' - TGGCAAATGAGCACTAAGGAA<br>5' - CCTAATCCTCGTACTCCGCTTC       | 383                                   |
| <i>RPL8C</i>            | 5' - CGTCGTCTTCCGTCATCCA<br>5' - GAGGTTTCTCGGTCCTTCCA           | 356                                   |
| <i>RPL19B</i>           | 5' - ATCCACAAGTCCAAGGCTGAG<br>5' - CACAAACATCTTCCATCTTCCATT     | 347                                   |
| <i>RPS4A</i>            | 5' - AAGATGCTGCTGGGCACGAA<br>5' - TCTATGACATCACCCACAACACAA      | 269                                   |
| <i>RPSA</i>             | 5' - ACAAACCCCTGGTGCTCCTA<br>5' - TTCCATTGTTTCGACATAGCTCATA     | 132                                   |
| <i>RPS9C</i>            | 5' - ATTAGGGTTGGTAGGCAAGTGG                                     | 262                                   |

|              |                                |     |
|--------------|--------------------------------|-----|
|              | 5' - CAATGGAGGTGATGGCAAAGT     |     |
| <i>eIF2A</i> | 5' - GTGAGCGAACGGGATGATAAA     | 238 |
|              | 5' - TCCATGAGATGAGGCCAATTG     |     |
| <i>eIF2B</i> | 5' - TAGGTGTGCTTACTCCTTCCGTC   | 261 |
|              | 5' - TGGCAATCTTTGCATTCTTCAA    |     |
| <i>eIF3B</i> | 5' - GCTTGAAACAATGGCAACTGC     | 363 |
|              | 5' - CCATTCGCTTATCCATTTTTCC    |     |
| <i>eIF4A</i> | 5' - TGGTCGTTTCAGGTCGCTTTG     | 239 |
|              | 5' - TGCCTTCAGTTTCCACGGTG      |     |
| <i>GAPDH</i> | 5' - TTGTTGGCGATTCCAGGTCT      | 270 |
|              | 5' - TCACTGATTTATGTCCCGTGCA    |     |
| <i>COX</i>   | 5' - GCTCCTGCTGTTGTCAAGTCCT    | 196 |
|              | 5' - GATCATCATCGCCATGTCCG      |     |
| <i>ACT7</i>  | 5' - AGAATGAGCAAGGAAATCACAGC   | 255 |
|              | 5' - CGAAACCCAAGCCAAACCA       |     |
| <i>FBA</i>   | 5' - CAAAGTGAGGAGGAGGCTACCC    | 329 |
|              | 5' - CCCCCAAAATCATCAATACAGAA   |     |
| <i>KCS13</i> | 5' - AAGCGTTTGAACACTTCTGTATCCA | 287 |
|              | 5' - TGGTCCATCTTTTGGTGTTTTG    |     |
| <i>SUR4</i>  | 5' - TAATGGCGATGCTTGACTIONTCTA | 150 |
|              | 5' - ATTGTTGACCTTTGGGGGAGT     |     |
| <i>ERF6</i>  | 5' - CCCACCAAAAATCAAGCAGC      | 211 |
|              | 5' - ATTCCAGGCTCCAGATTTGTTC    |     |

---

**Bisulfite sequencing analysis**

---

|              |                                |     |
|--------------|--------------------------------|-----|
| <i>KCS13</i> | 5' - TTATTGATGAAAGYAAGGGTTTA   | 299 |
|              | 5' - AATTAATCCCTTTATRTTAAATCA  |     |
| <i>SUR4</i>  | 5' - TTTTAATTGTTTGGGGGTGTTT    | 366 |
|              | 5' - TCCCATTCTATCTTTTRTRAAA    |     |
| <i>ERF6</i>  | 5' - GGGTGGYGGATTATGTTA        | 391 |
|              | 5' - TTATTATTRTCATTRATCCCTAART |     |
| <i>TUB3</i>  | 5' - TATAYTTTTYGAATTTTAAAATTT  | 362 |
|              | 5' - AAARRAAAATACCTTAATTTAACA  |     |
| <i>EIF2A</i> | 5' - TGTATTYGTYAGGAGYAAGGTA    | 450 |
|              | 5' - TTRATAATTATCCTTCTCCCTRT   |     |

---

**Methylation-sensitive Southern blotting**

---

|                          |                                     |     |
|--------------------------|-------------------------------------|-----|
| <i>KCS13 -466 ~ -178</i> | 5' - TGTCTGGTTATTCCGTGAGCC          | 289 |
|                          | 5' - GCAGTCAGGCAGATGAGAGGAT         |     |
| <i>SRU4 -1155 ~ -856</i> | 5' - GATAAGAGCTTCTAAATAGGTTTATGGTTG | 300 |

|                                  |                                      |     |
|----------------------------------|--------------------------------------|-----|
|                                  | 5' - CAATACTTAATACTTGTTAATGTAGTTCCGG |     |
| <i>ERF6</i> -263 ~ -21           | 5' - CACCGGGCACAATTTTTCACA           | 243 |
|                                  | 5' - CTCATAACACAAGGTATTATTTCTGGG     |     |
| <i>ERF6</i> -173 ~ -14           | 5' - ACCTCCAAAATGTCCCTCACTT          | 187 |
|                                  | 5' - GCACCTCCACACATAGACCAAGA         |     |
| <b>Methylation-sensitive PCR</b> |                                      |     |
| <i>KCS13</i> -770 ~ -447         | 5' - GAAGCCTGAGACCAACCGATAT          | 324 |
|                                  | 5' - GCTCACGGAATAACCAGACAAT          |     |
| <i>SUR4</i> -1014 ~ -346         | 5' - GAGTTTGACTTCGGGGTTGC            | 669 |
|                                  | 5' - CCACCCTACCATCTACTCTGTTTT        |     |
| <i>ERF6</i> -594 ~ -96           | 5' - CACCGGGCACAATTTTTCACA           | 499 |
|                                  | 5' - CTCATAACACAAGGTATTATTTCTGGG     |     |
| <i>ERF6</i> -496 ~ -90           | 5' - GCGTCCAACATTCTACATTCCTAC        | 407 |
|                                  | 5' - TCAGAAGGTGTGTAGCCGAGAG          |     |
| <b>RNAi line vector</b>          |                                      |     |
| <i>ROS1 pos</i>                  | 5' - GAGCTGGTGGGATGAATAATGTGCTTGCTC  | 549 |
|                                  | 5' - CCCGGGCAGATGTTCCATTTTCAGTAGCAC  |     |
| <i>ROS1 neg</i>                  | 5' - CTCGAGGTGGGATGAATAATGTGCTTGCTC  | 549 |
|                                  | 5' - GTCGACCAGATGTTCCATTTTCAGTAGCAC  |     |
| <i>NPTII</i>                     | 5' - GCGATACCGTAAAGCACGAGGAA         | 417 |
|                                  | 5' - TCCTGCCGAGAAAGTATCCATCA         |     |
