# Supplementary material for: A Potential Role for CHH DNA Methylation in Cotton Fiber Growth Patterns
Source: PubMed Central journal article supplement (PMC3625195; doi:10.1371/journal.pone.0060547), 2013-04-12
Supplement: pone.0060547.s011.pdf [file pone.0060547.s011.pdf]

**Table S7.** Statistical Analysis of Methylation Pattern Changes in All the Cytosine Sites Present in the Upstream Regions Shown in Figure 3.

| <b>Cytosine</b>  |             | <b>Feb.</b> |             |             |             |       | <b>P value<sup>#</sup></b> |
|------------------|-------------|-------------|-------------|-------------|-------------|-------|----------------------------|
| <b>Sites No.</b> | <b>Feb.</b> | <b>May</b>  | <b>Aug.</b> | <b>Nov.</b> | <b>2011</b> |       |                            |
| <b>a</b> 1       | 0           | 1           | 0           | 0           | 0           | N/A   |                            |
| 2                | 0           | 1           | 2           | 0           | 2           | 0.145 |                            |
| 3                | 17          | 16          | 17          | 17          | 17          | N/A   |                            |
| 4                | 16          | 17          | 17          | 17          | 17          | 0.310 |                            |
| 5                | 1           | 1           | 0           | 0           | 0           | 0.310 |                            |
| 6                | 9           | 7           | 4           | 7           | 10          | 0.037 |                            |
| 7                | 0           | 1           | 0           | 1           | 0           | N/A   |                            |
| 8                | 10          | 7           | 5           | 9           | 11          | 0.084 |                            |
| 9                | 3           | 5           | 2           | 3           | 5           | 0.628 |                            |
| 10               | 1           | 0           | 2           | 1           | 1           | 0.545 |                            |
| 11               | 7           | 5           | 3           | 3           | 7           | 0.132 |                            |
| 12               | 1           | 1           | 1           | 1           | 3           | 1.000 |                            |
| 13               | 9           | 4           | 5           | 4           | 9           | 0.163 |                            |
| 14               | 4           | 0           | 0           | 1           | 4           | 0.146 |                            |
| 15               | 13          | 10          | 7           | 9           | 13          | 0.037 |                            |
| 16               | 7           | 0           | 3           | 3           | 7           | 0.132 |                            |
| 17               | 0           | 0           | 0           | 0           | 0           | N/A   |                            |
| 18               | 0           | 0           | 0           | 0           | 1           | N/A   |                            |
| 19               | 16          | 17          | 15          | 16          | 17          | 0.545 |                            |
| 20               | 1           | 0           | 0           | 0           | 1           | 0.310 |                            |
| 21               | 2           | 2           | 1           | 1           | 2           | 0.545 |                            |
| 22               | 0           | 0           | 2           | 1           | 0           | 0.145 |                            |
| 23               | 0           | 0           | 0           | 0           | 1           | N/A   |                            |
| 24               | 6           | 8           | 4           | 5           | 7           | 0.452 |                            |
| 25               | 0           | 0           | 0           | 0           | 0           | N/A   |                            |
| 26               | 0           | 3           | 0           | 1           | 1           | N/A   |                            |
| 27               | 0           | 2           | 2           | 1           | 0           | 0.145 |                            |
| 28               | 1           | 2           | 0           | 0           | 1           | 0.310 |                            |
| 29               | 1           | 0           | 0           | 0           | 1           | 0.310 |                            |
| 30               | 1           | 2           | 2           | 4           | 2           | 0.545 |                            |
| 31               | 0           | 0           | 0           | 0           | 0           | N/A   |                            |
| 32               | 0           | 0           | 0           | 0           | 0           | N/A   |                            |
| 33               | 0           | 0           | 0           | 0           | 1           | N/A   |                            |
| 34               | 16          | 17          | 17          | 17          | 17          | 0.310 |                            |
| 35               | 0           | 1           | 0           | 1           | 2           | N/A   |                            |

|    |    |    |    |    |    |       |
|----|----|----|----|----|----|-------|
| 36 | 17 | 17 | 16 | 17 | 17 | 0.310 |
| 37 | 0  | 0  | 0  | 0  | 0  | N/A   |
| 38 | 1  | 2  | 1  | 0  | 0  | 1.000 |
| 39 | 0  | 1  | 3  | 2  | 1  | 0.070 |
| 40 | 0  | 0  | 0  | 1  | 0  | N/A   |
| 41 | 0  | 1  | 0  | 0  | 1  | N/A   |
| 42 | 16 | 11 | 12 | 15 | 17 | 0.072 |
| 43 | 3  | 4  | 3  | 3  | 3  | 1.000 |
| 44 | 6  | 2  | 5  | 6  | 6  | 0.714 |
| 45 | 3  | 3  | 2  | 1  | 2  | 0.628 |
| 46 | 3  | 0  | 0  | 1  | 2  | 0.070 |
| 47 | 9  | 6  | 6  | 6  | 9  | 0.300 |
| 48 | 2  | 0  | 0  | 1  | 1  | 0.145 |
| 49 | 2  | 3  | 3  | 3  | 3  | 0.628 |
| 50 | 8  | 3  | 0  | 2  | 8  | 0.001 |
| 51 | 1  | 1  | 0  | 1  | 1  | 0.310 |
| 52 | 2  | 7  | 0  | 1  | 5  | 0.145 |
| 53 | 0  | 0  | 0  | 0  | 0  | N/A   |
| 54 | 2  | 2  | 2  | 0  | 3  | 1.000 |
| 55 | 1  | 0  | 0  | 1  | 1  | 0.310 |
| 56 | 11 | 8  | 5  | 7  | 10 | 0.039 |
| 57 | 0  | 0  | 0  | 0  | 0  | N/A   |
| 58 | 17 | 17 | 17 | 17 | 16 | N/A   |
| 59 | 17 | 17 | 16 | 17 | 17 | 0.310 |
| 60 | 0  | 2  | 1  | 1  | 2  | 0.310 |
| 61 | 7  | 5  | 3  | 5  | 6  | 0.132 |
| 62 | 1  | 0  | 0  | 1  | 1  | 0.310 |
| 63 | 1  | 0  | 0  | 1  | 1  | 0.310 |
| 64 | 17 | 17 | 17 | 17 | 17 | N/A   |
| 65 | 0  | 1  | 0  | 0  | 0  | N/A   |
| 66 | 1  | 2  | 4  | 2  | 0  | 0.146 |
| 67 | 0  | 0  | 0  | 1  | 0  | N/A   |
| 68 | 4  | 2  | 1  | 2  | 5  | 0.146 |
| 69 | 1  | 1  | 0  | 1  | 1  | 0.310 |
| 70 | 0  | 0  | 0  | 0  | 0  | N/A   |
| 71 | 3  | 2  | 4  | 0  | 3  | 0.671 |
| 72 | 0  | 0  | 0  | 0  | 0  | N/A   |
| 73 | 0  | 0  | 0  | 0  | 1  | N/A   |

|            |    |    |    |    |    |       |
|------------|----|----|----|----|----|-------|
| 74         | 0  | 0  | 3  | 3  | 1  | 0.070 |
| 75         | 3  | 5  | 5  | 3  | 4  | 0.419 |
| 76         | 0  | 0  | 0  | 0  | 0  | N/A   |
| 77         | 0  | 1  | 0  | 0  | 0  | N/A   |
| 78         | 9  | 7  | 5  | 7  | 11 | 0.039 |
| 79         | 14 | 11 | 12 | 13 | 14 | 0.419 |
| 80         | 0  | 0  | 2  | 1  | 0  | 0.145 |
| 81         | 8  | 5  | 2  | 4  | 8  | 0.024 |
| 82         | 17 | 15 | 13 | 16 | 17 | 0.033 |
| 83         | 11 | 12 | 11 | 13 | 11 | 1.000 |
| <b>b</b> 1 | 0  | 0  | 0  | 0  | 0  | N/A   |
| 2          | 3  | 3  | 3  | 3  | 3  | 1.000 |
| 3          | 3  | 3  | 3  | 4  | 3  | 1.000 |
| 4          | 2  | 2  | 2  | 3  | 3  | 1.000 |
| 5          | 11 | 7  | 4  | 8  | 10 | 0.016 |
| 6          | 3  | 3  | 3  | 2  | 3  | 1.000 |
| 7          | 17 | 17 | 16 | 17 | 17 | 0.310 |
| 8          | 16 | 16 | 17 | 16 | 15 | 0.310 |
| 9          | 3  | 3  | 3  | 3  | 2  | 1.000 |
| 10         | 6  | 6  | 2  | 5  | 6  | 0.106 |
| 11         | 17 | 17 | 17 | 16 | 17 | N/A   |
| 12         | 4  | 4  | 4  | 5  | 4  | 1.000 |
| 13         | 3  | 3  | 3  | 4  | 4  | 1.000 |
| 14         | 10 | 9  | 9  | 9  | 10 | 0.730 |
| 15         | 5  | 5  | 4  | 5  | 5  | 0.697 |
| 16         | 7  | 7  | 6  | 7  | 9  | 0.724 |
| 17         | 10 | 7  | 4  | 8  | 11 | 0.037 |
| 18         | 9  | 8  | 8  | 9  | 10 | 0.732 |
| 19         | 6  | 6  | 5  | 6  | 5  | 0.714 |
| 20         | 16 | 17 | 17 | 17 | 17 | 0.310 |
| 21         | 8  | 8  | 7  | 8  | 8  | 0.730 |
| 22         | 17 | 16 | 16 | 16 | 16 | 0.310 |
| 23         | 7  | 7  | 6  | 7  | 8  | 0.724 |
| 24         | 8  | 9  | 8  | 9  | 8  | 1.000 |
| 25         | 4  | 4  | 4  | 4  | 6  | 1.000 |
| 26         | 10 | 5  | 3  | 6  | 11 | 0.013 |
| 27         | 12 | 8  | 5  | 9  | 12 | 0.016 |

|          |    |    |    |    |    |       |
|----------|----|----|----|----|----|-------|
| 28       | 6  | 5  | 5  | 6  | 7  | 0.714 |
| 29       | 10 | 8  | 4  | 7  | 11 | 0.037 |
| 30       | 3  | 3  | 3  | 3  | 3  | 1.000 |
| 31       | 10 | 7  | 4  | 7  | 10 | 0.037 |
| 32       | 12 | 9  | 5  | 9  | 12 | 0.016 |
| 33       | 8  | 8  | 5  | 8  | 10 | 0.290 |
| 34       | 4  | 4  | 3  | 3  | 5  | 0.671 |
| 35       | 1  | 1  | 1  | 2  | 4  | 1.000 |
| 36       | 4  | 3  | 3  | 4  | 5  | 0.671 |
| 37       | 4  | 4  | 5  | 5  | 5  | 0.697 |
| 38       | 8  | 6  | 5  | 5  | 9  | 0.290 |
| 39       | 2  | 2  | 2  | 2  | 3  | 1.000 |
| 40       | 3  | 4  | 4  | 3  | 5  | 0.671 |
| 41       | 2  | 3  | 2  | 3  | 3  | 1.000 |
| <b>c</b> |    |    |    |    |    |       |
| 1        | 1  | 1  | 2  | 2  | 1  | 0.545 |
| 2        | 7  | 6  | 6  | 6  | 7  | 0.724 |
| 3        | 2  | 1  | 1  | 2  | 2  | 0.545 |
| 4        | 4  | 4  | 3  | 5  | 3  | 0.671 |
| 5        | 10 | 9  | 9  | 10 | 10 | 0.730 |
| 6        | 13 | 14 | 14 | 14 | 14 | 0.671 |
| 7        | 11 | 10 | 10 | 10 | 11 | 0.724 |
| 8        | 12 | 11 | 12 | 12 | 12 | 1.000 |
| 9        | 11 | 11 | 10 | 10 | 12 | 0.724 |
| 10       | 5  | 6  | 5  | 6  | 6  | 1.000 |
| 11       | 8  | 8  | 7  | 7  | 8  | 0.730 |
| 12       | 10 | 7  | 4  | 7  | 9  | 0.037 |
| 13       | 6  | 7  | 6  | 7  | 6  | 1.000 |
| 14       | 8  | 5  | 2  | 5  | 7  | 0.024 |
| 15       | 17 | 17 | 17 | 16 | 17 | N/A   |
| 16       | 11 | 8  | 4  | 8  | 10 | 0.016 |
| 17       | 13 | 11 | 8  | 11 | 12 | 0.031 |
| 18       | 12 | 13 | 13 | 14 | 13 | 0.697 |
| 19       | 17 | 16 | 16 | 16 | 16 | 0.310 |
| 20       | 14 | 14 | 13 | 14 | 15 | 0.671 |
| 21       | 14 | 15 | 15 | 16 | 14 | 0.628 |
| 22       | 17 | 17 | 16 | 15 | 17 | 0.310 |
| 23       | 12 | 10 | 10 | 11 | 10 | 0.473 |

|    |    |    |    |    |    |       |
|----|----|----|----|----|----|-------|
| 24 | 0  | 0  | 0  | 0  | 0  | N/A   |
| 25 | 10 | 10 | 10 | 10 | 11 | 1.000 |
| 26 | 12 | 12 | 12 | 12 | 12 | 1.000 |
| 27 | 16 | 16 | 16 | 17 | 15 | 1.000 |
| 28 | 8  | 7  | 6  | 7  | 7  | 0.486 |
| 29 | 8  | 7  | 6  | 6  | 8  | 0.486 |
| 30 | 1  | 0  | 1  | 2  | 2  | 1.000 |
| 31 | 6  | 6  | 3  | 7  | 6  | 0.244 |
| 32 | 14 | 16 | 14 | 16 | 14 | 1.000 |
| 33 | 15 | 16 | 15 | 16 | 15 | 1.000 |
| 34 | 11 | 10 | 10 | 11 | 12 | 0.724 |
| 35 | 16 | 16 | 17 | 17 | 17 | 0.310 |
| 36 | 12 | 8  | 5  | 9  | 11 | 0.016 |
| 37 | 10 | 9  | 7  | 9  | 9  | 0.303 |
| 38 | 7  | 7  | 6  | 6  | 7  | 0.724 |
| 39 | 17 | 17 | 17 | 17 | 16 | N/A   |
| 40 | 12 | 12 | 10 | 11 | 10 | 0.473 |
| 41 | 14 | 15 | 14 | 15 | 14 | 1.000 |

<sup>#</sup>Cytosine sites with  $P < 0.05$  were gray shadowed in the Table.

a, *ERF6* upstream region as shown in Figure 3A; b, *SUR4* upstream region as shown in Figure 3B; c, *KCSI3* upstream region as shown in Figure 3C.
