# Supplementary material for: A Potential Role for CHH DNA Methylation in Cotton Fiber Growth Patterns
Source: PubMed Central journal article supplement (PMC3625195; doi:10.1371/journal.pone.0060547), 2013-04-12
Supplement: pone.0060547.s012.pdf [file pone.0060547.s012.pdf]

**Table S8.** Digital Intensities of Methylation-Sensitive Endonuclease-Digested and Full-Length Fragments

| Gene         | Biological replicate | Fragment (bp) | February               |                    | May       |       | August    |       | November  |       |
|--------------|----------------------|---------------|------------------------|--------------------|-----------|-------|-----------|-------|-----------|-------|
|              |                      |               | Intensity <sup>a</sup> | Ratio <sup>b</sup> | Intensity | Ratio | Intensity | Ratio | Intensity | Ratio |
| <i>SUR4</i>  | 1                    | 1611          | 425                    |                    | 299       |       | 249       |       | 301       |       |
|              |                      | 330           | 212                    | 2.00               | 331       | 0.90  | 470       | 0.53  | 305       | 0.99  |
|              | 2                    | 1611          | 373                    |                    | 296       |       | 155       |       | 304       |       |
|              |                      | 330           | 173                    | 2.16               | 316       | 0.94  | 400       | 0.39  | 309       | 0.98  |
| <i>KCS13</i> | 1                    | 1716          | 1300                   |                    | 896       |       | 491       |       | 954       |       |
|              |                      | 837           | 525                    | 2.47               | 655       | 1.37  | 1089      | 0.45  | 701       | 1.36  |
|              | 2                    | 1716          | 1181                   |                    | 976       |       | 576       |       | 988       |       |
|              |                      | 837           | 506                    | 2.33               | 674       | 1.45  | 1036      | 0.56  | 724       | 1.37  |
| <i>ERF6</i>  | 1                    | 605           | 627                    |                    | 397       |       | 332       |       | 393       |       |
|              |                      | 244           | 337                    | 1.86               | 422       | 0.94  | 651       | 0.51  | 460       | 0.85  |
|              | 2                    | 605           | 670                    |                    | 390       |       | 304       |       | 425       |       |
|              |                      | 244           | 339                    | 1.98               | 479       | 0.81  | 689       | 0.44  | 496       | 0.86  |

<sup>a</sup>Intensity, background-subtracted pixel intensity of each fragment on the X-ray film. Data obtained from two independent Southern blots.

<sup>b</sup>Ratio of methylated to unmethylated DNA calculated by dividing the signal of the full-length sequence by that of the corresponding endonuclease-cleaved fragment.
